# Supplementary material for: Effect of the type of N-substituent in the benzo-18-azacrown-6 compound on copper(ii) chelation: complexation, radiolabeling, stability in vitro, and biodistribution in vivo
Source: Royal Society of Chemistry journal article supplement (doi:10.1039/d3dt00742a), 2023-01-01
Supplement: d3dt00742a1.pdf [file d3dt00742a1.pdf]

Electronic Supplementary Material (ESI) for

Effect of the type of N-substituent in the benzo-18-azacrown-6 compound on copper (II) chelation:  
complexation, radiolabeling, stability in vitro and biodistribution in vivo

by Zamurueva L.S., Egorova B.V., Ikonnikova I.S., Zubenko A.D., Pashanova A.V., Karnoukhova V.A., Mitrofanov A.A., Trigub A.L., Moiseeva A.A., Priselkova A.B., Fedorova O.A., Kalmykov S.N.

Content:

|                                                                                                                                                  |             |
|--------------------------------------------------------------------------------------------------------------------------------------------------|-------------|
| <i>data</i>                                                                                                                                      | <i>page</i> |
| <sup>1</sup> H NMR chemical shifts ( $\Delta\delta$ , ppm) of H <sub>4</sub> BATPic recorded in D <sub>2</sub> O solution at different pH values | 1           |
| MS data                                                                                                                                          | 1-4         |
| NMR spectra                                                                                                                                      | 4-7         |
| Potentiometric titration curves: observed, calculated                                                                                            | 8-9         |
| pH speciation diagram in pH range 0-12                                                                                                           | 10          |
| logKeff as a function of pH                                                                                                                      | 10          |
| Spectrophotometric data                                                                                                                          | 11-13       |
| Cyclic voltammograms                                                                                                                             | 14-15       |
| Biodistribution (% ID/g) of the Cu <sup>2+</sup> complexes with H <sub>4</sub> BATPic in mice at 1 and 6 hours after injection                   | 15          |
| The representation of the squeezed void in the form of infinite channels in the crystal structure Cu <sub>2</sub> BATPy <sup>4+</sup> .          | 16          |
| Calculated geometries of complexes: distances and coordinates in Angstrom of optimized geometries of complexes                                   | 16          |

**Table S1** <sup>1</sup>H NMR chemical shifts ( $\delta$ , ppm) of H<sub>4</sub>BATPic recorded in D<sub>2</sub>O solution at different pH values.

| proton          | pH   |      |      |      |      |      |      |      |
|-----------------|------|------|------|------|------|------|------|------|
|                 | 9,8  | 8,3  | 7,3  | 6,0  | 4,6  | 3,5  | 3,0  | 2,1  |
| H <sub>1</sub>  | 6,88 | 6,86 | 6,83 | 6,83 | 6,80 | 6,80 | 6,81 | 6,81 |
| H <sub>2</sub>  | 6,88 | 6,86 | 6,77 | 6,75 | 6,69 | 6,67 | 6,66 | 6,66 |
| H <sub>4</sub>  | 4,06 | 4,13 | 4,13 | 4,14 | 4,13 | 4,13 | 4,13 | 4,15 |
| H <sub>5</sub>  | 2,95 | 3,19 | 3,34 | 3,41 | 3,50 | 3,56 | 3,56 | 3,63 |
| H <sub>6</sub>  | 2,66 | 3,19 | 3,34 | 3,41 | 3,50 | 3,52 | 3,56 | 3,55 |
| H <sub>7</sub>  | 2,61 | 3,10 | 3,21 | 3,30 | 3,47 | 3,52 | 3,56 | 3,63 |
| H <sub>8</sub>  | 2,56 | 3,19 | 3,34 | 3,41 | 3,47 | 3,49 | 3,49 | 3,46 |
| H <sub>9</sub>  | 3,71 | 3,99 | 4,09 | 4,18 | 4,32 | 4,40 | 4,45 | 4,51 |
| H <sub>10</sub> | 3,55 | 3,96 | 4,09 | 4,14 | 4,21 | 4,26 | 4,29 | 4,29 |
| H <sub>12</sub> | 7,30 | 7,34 | 7,31 | 7,32 | 7,43 | 7,52 | 7,59 | 7,63 |
| H <sub>13</sub> | 7,66 | 7,64 | 7,64 | 7,68 | 7,75 | 7,86 | 7,94 | 7,97 |
| H <sub>14</sub> | 7,66 | 7,64 | 7,64 | 7,65 | 7,66 | 7,76 | 7,86 | 7,91 |
| H <sub>18</sub> | 7,11 | 7,19 | 7,23 | 7,26 | 7,36 | 7,48 | 7,57 | 7,59 |
| H <sub>19</sub> | 7,57 | 7,64 | 7,59 | 7,65 | 7,73 | 7,84 | 7,86 | 7,91 |
| H <sub>20</sub> | 7,64 | 7,64 | 7,59 | 7,62 | 7,66 | 7,70 | 7,74 | 7,80 |

**MS data**

BATPic-Cu<sup>2+</sup>: MS (ESI): m/z [M - 2H + 2Cu]<sup>2+</sup> calcd for C<sub>44</sub>H<sub>48</sub>N<sub>8</sub>O<sub>10</sub> - 2H<sup>+</sup> + 2Cu<sup>2+</sup>: 486.0964; found: 486.0950; [M - 3H + 2Cu]<sup>+</sup> calcd for C<sub>44</sub>H<sub>48</sub>N<sub>8</sub>O<sub>10</sub> - 3H<sup>+</sup> + 2Cu<sup>2+</sup>: 971.1851; found: 971.1824.

BATPy-Cu<sup>2+</sup>: MS (ESI): m/z m/z [M + Cu]<sup>2+</sup> calcd for C<sub>40</sub>H<sub>48</sub>N<sub>8</sub>O<sub>2</sub> + Cu<sup>2+</sup>: 367.6598; found: 367.6581; [M + Cu + ClO<sub>4</sub>]<sup>+</sup> calcd for C<sub>40</sub>H<sub>48</sub>N<sub>8</sub>O<sub>2</sub> + Cu<sup>2+</sup> + ClO<sub>4</sub><sup>-</sup>: 834.2681; found: 834.2616; [M + 2Cu + 2ClO<sub>4</sub>]<sup>2+</sup> calcd for C<sub>40</sub>H<sub>48</sub>N<sub>8</sub>O<sub>2</sub> + 2Cu<sup>2+</sup> + 2ClO<sub>4</sub><sup>-</sup>: 498.0731; found: 498.0716.

BATA-Cu<sup>2+</sup>: MS (ESI): m/z [M - 3H + Cu]<sup>-</sup> calcd for C<sub>24</sub>H<sub>36</sub>N<sub>4</sub>O<sub>10</sub> - 3H<sup>+</sup> + Cu<sup>2+</sup>: 600.1493; found: 600.1478, m/z [M - 2H + Cu + ClO<sub>4</sub>]<sup>-</sup> calcd for C<sub>24</sub>H<sub>36</sub>N<sub>4</sub>O<sub>10</sub> - 2H<sup>+</sup> + Cu<sup>2+</sup> + ClO<sub>4</sub><sup>-</sup>: 700.1056; found: 699.0356.

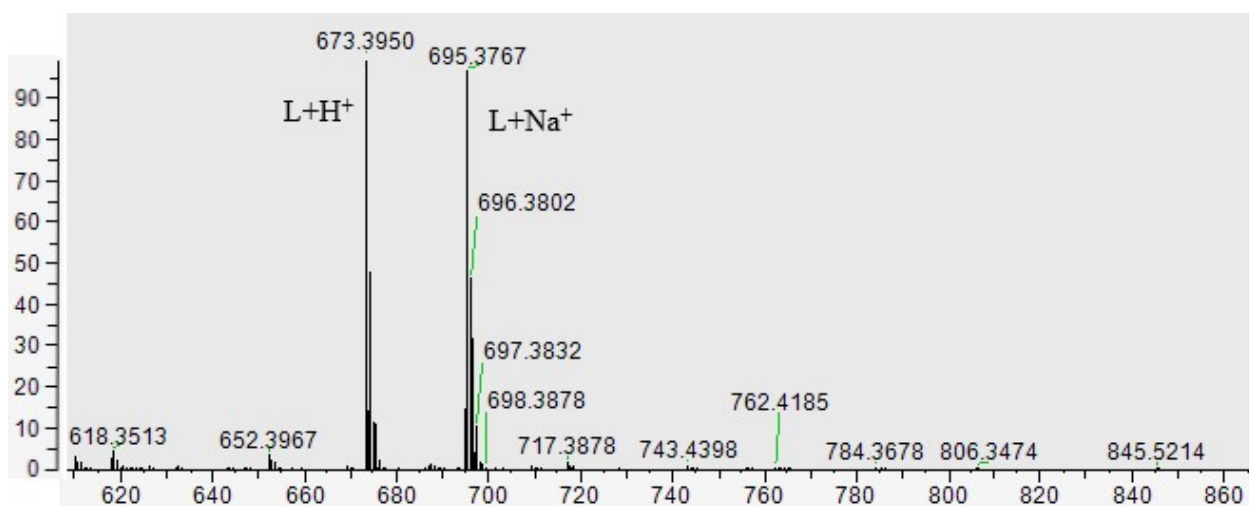

Fig. S1 ESI-MS spectra of BATPy.

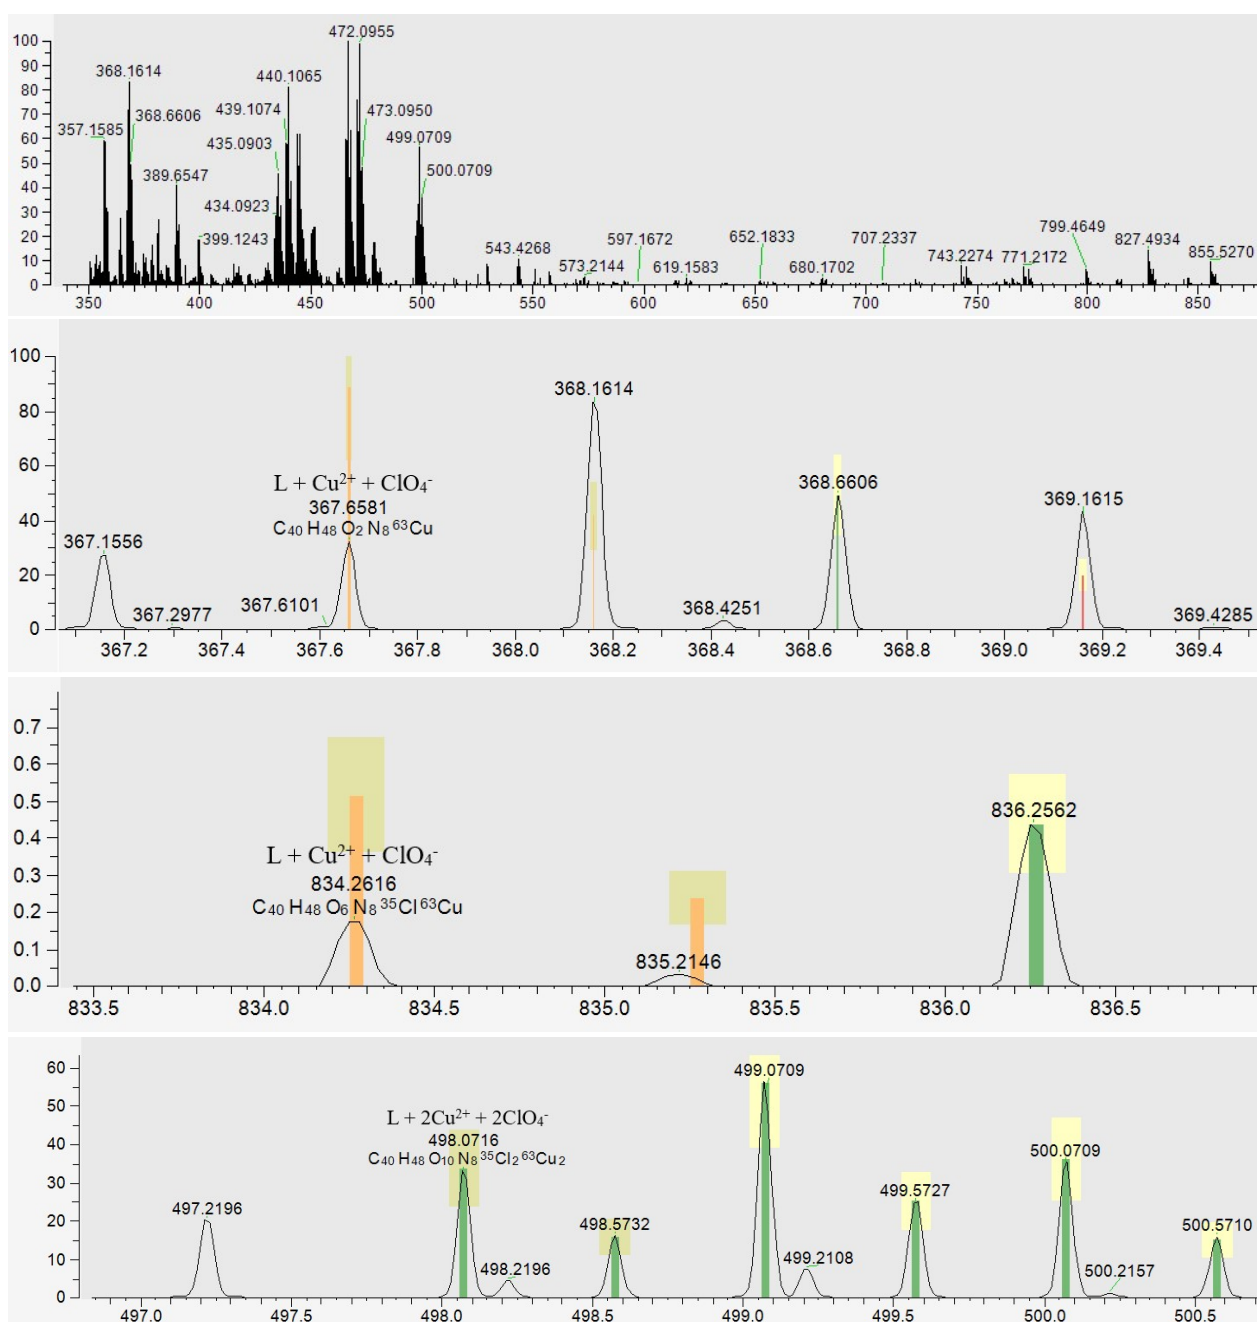

Fig. S2. ESI-MS spectra of BATPy-Cu.

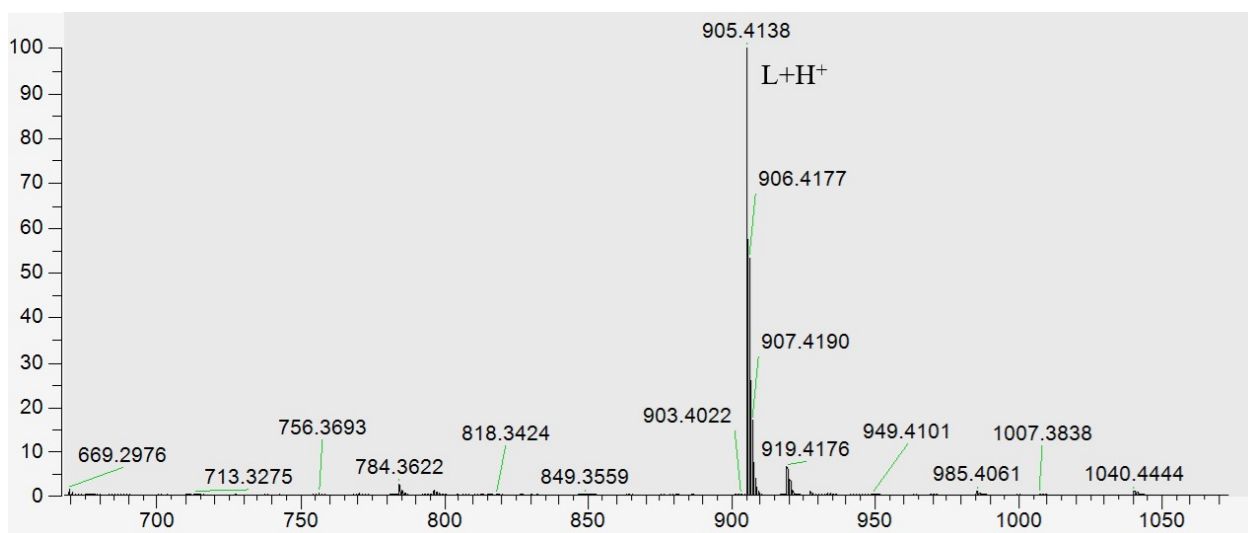

Fig. S3 ESI-MS spectra of compound Me<sub>4</sub>BATPic.

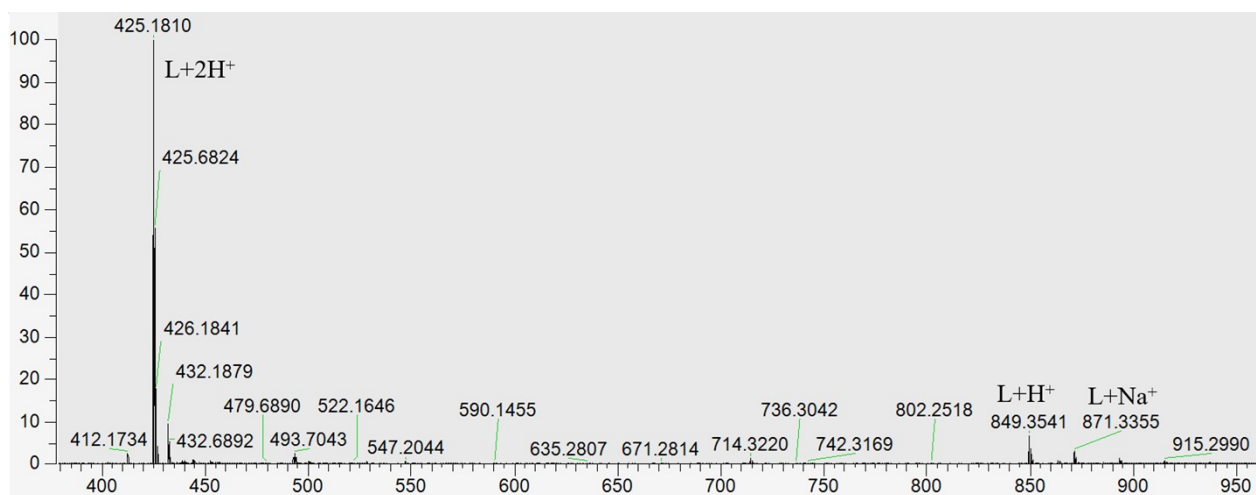

Fig. S4 ESI-MS spectra of H<sub>4</sub>BATPic.

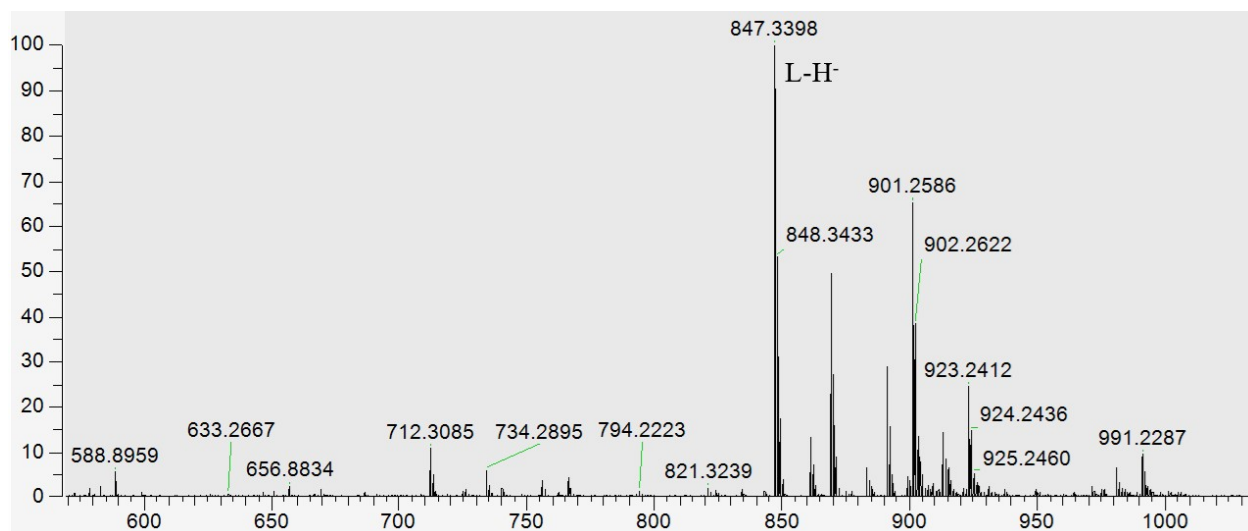

Fig. S5 ESI-MS spectra of H<sub>4</sub>BATPic.

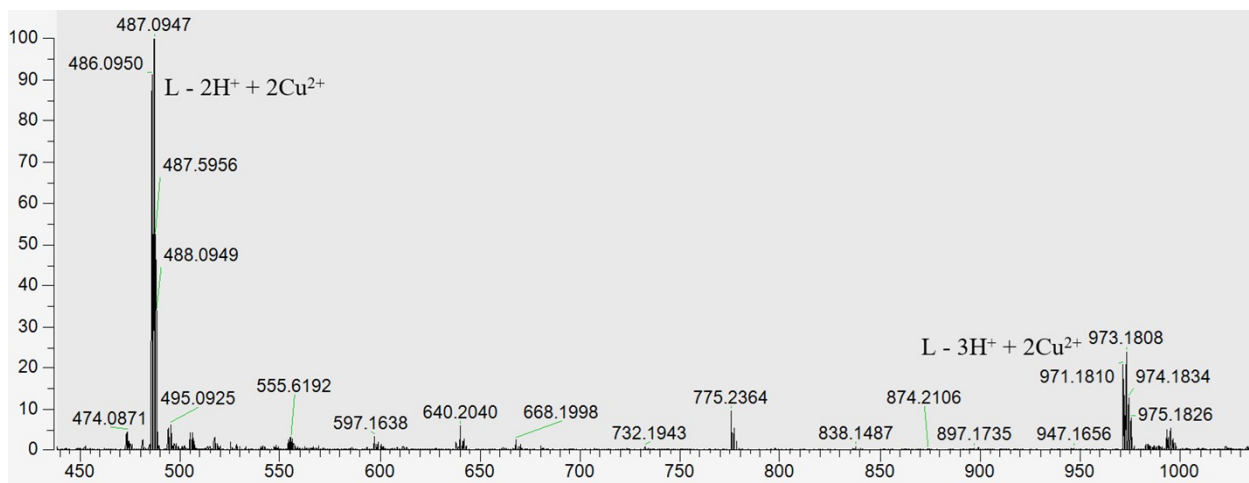

Fig. S6 ESI-MS spectra of  $H_4BATPic-Cu$ .

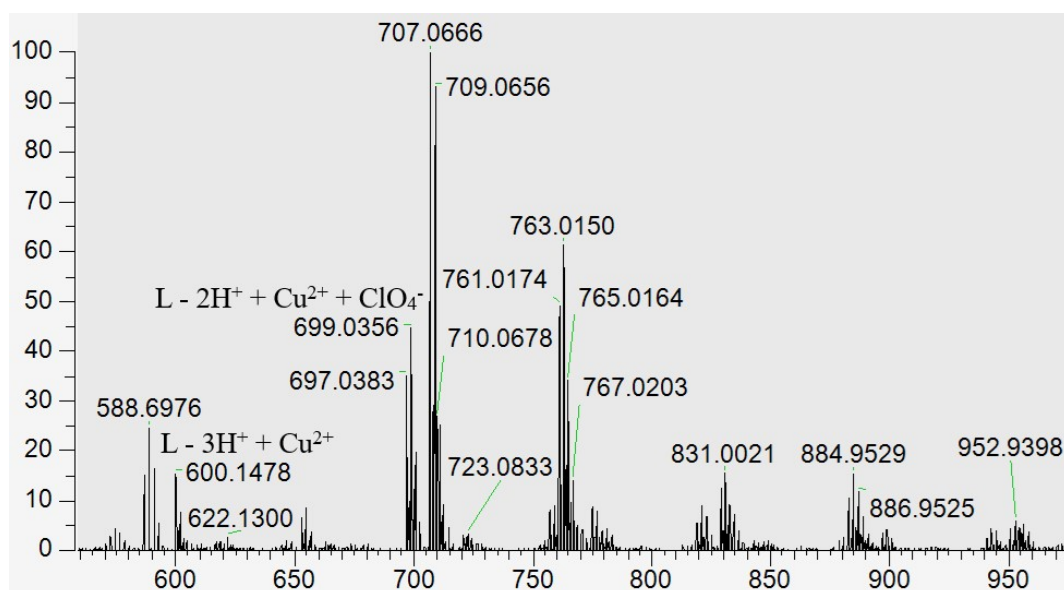

Fig. S7 ESI-MS spectra of  $H_4BATA-Cu$ .

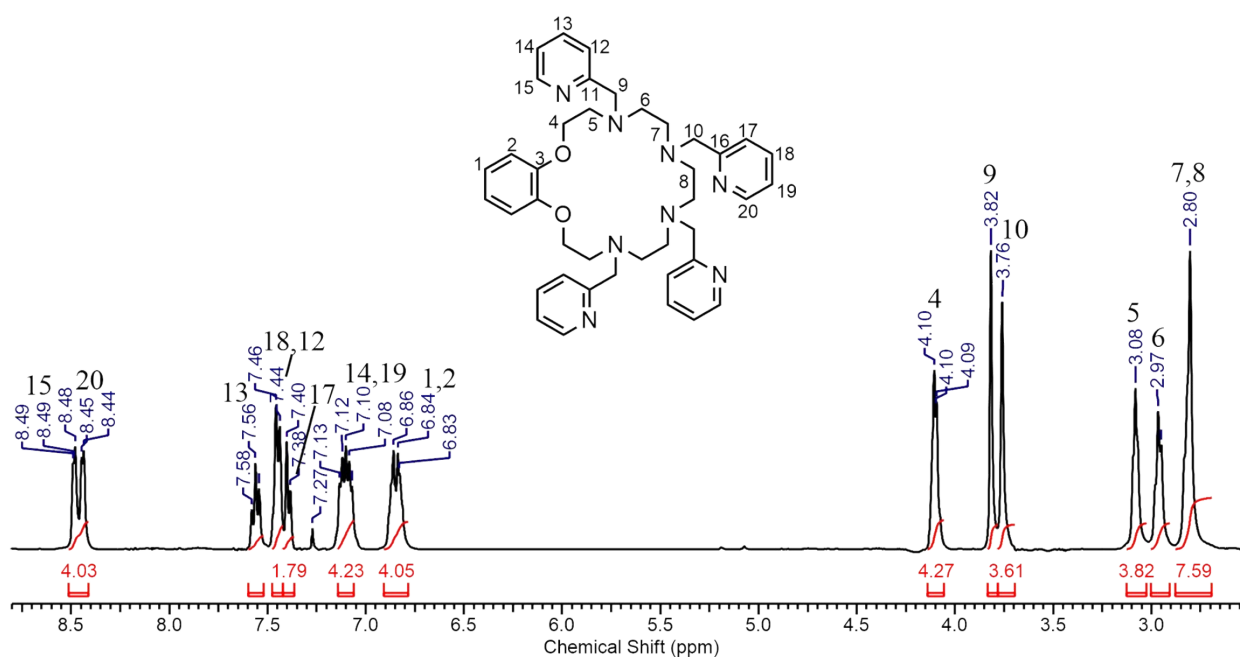

Fig. S8  $^1H$  NMR spectra of  $BATPy$ .

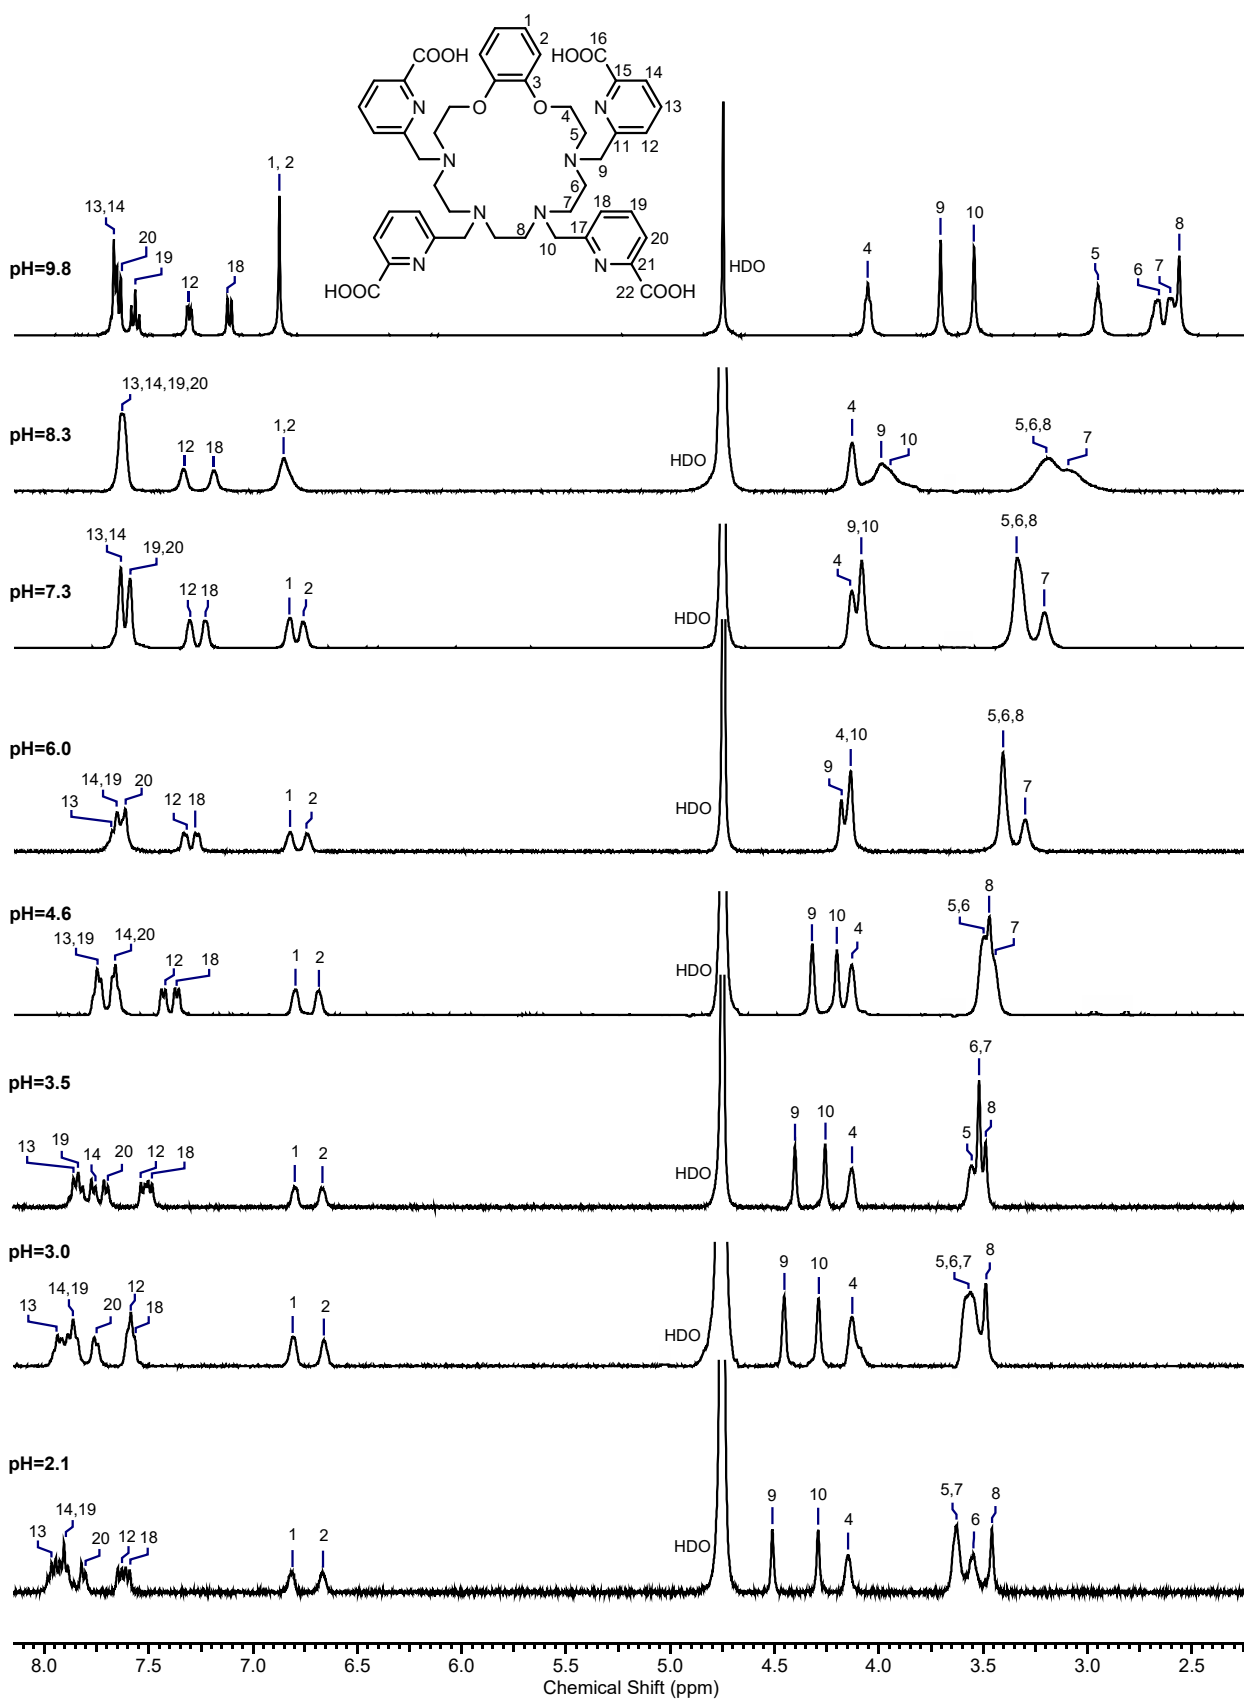

Fig. S9  $^1H$  NMR spectra of  $H_4BATPic$  recorded in  $D_2O$  solution at different pH values.

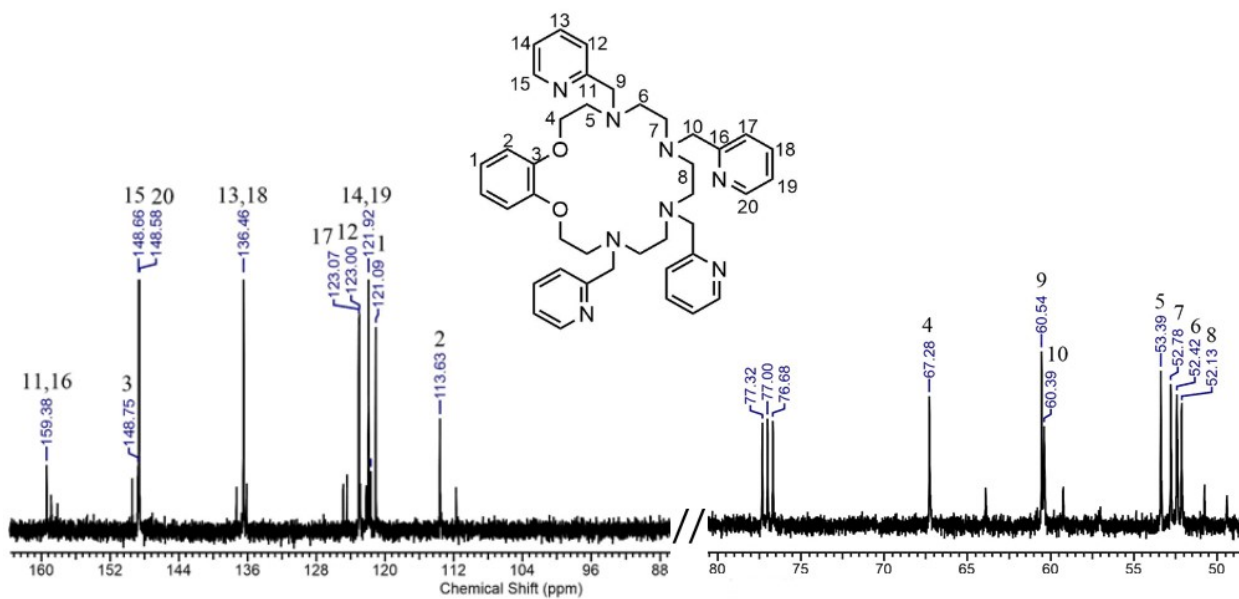

Fig. S10  $^{13}\text{C}$  NMR spectra of BATPy.

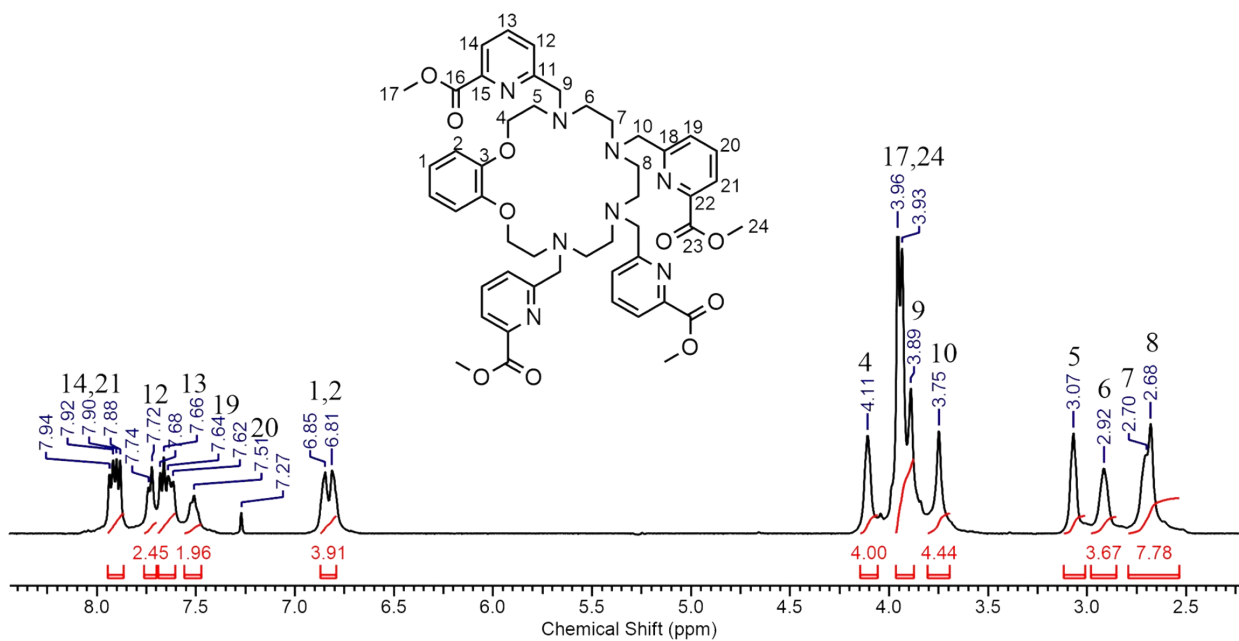

Fig. S11  $^1\text{H}$  NMR spectra of compound Me<sub>4</sub>BATPic.

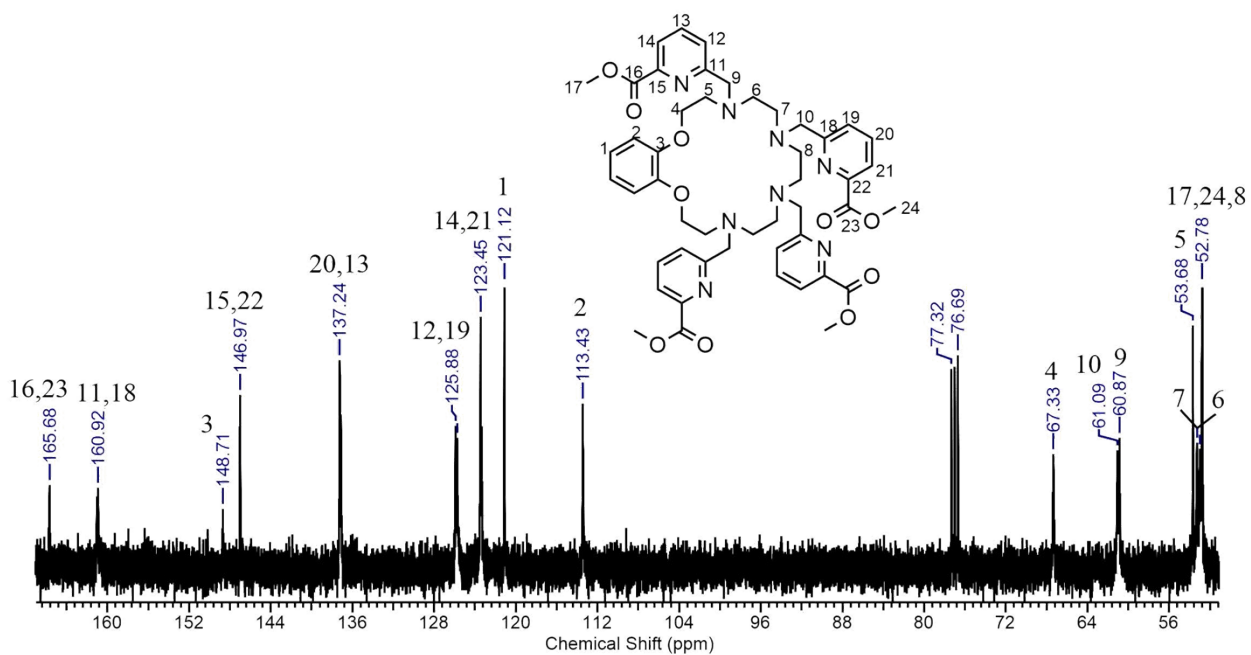

Fig. S12  $^{13}\text{C}$  NMR spectra of compound  $\text{Me}_4\text{BATPic}$ .

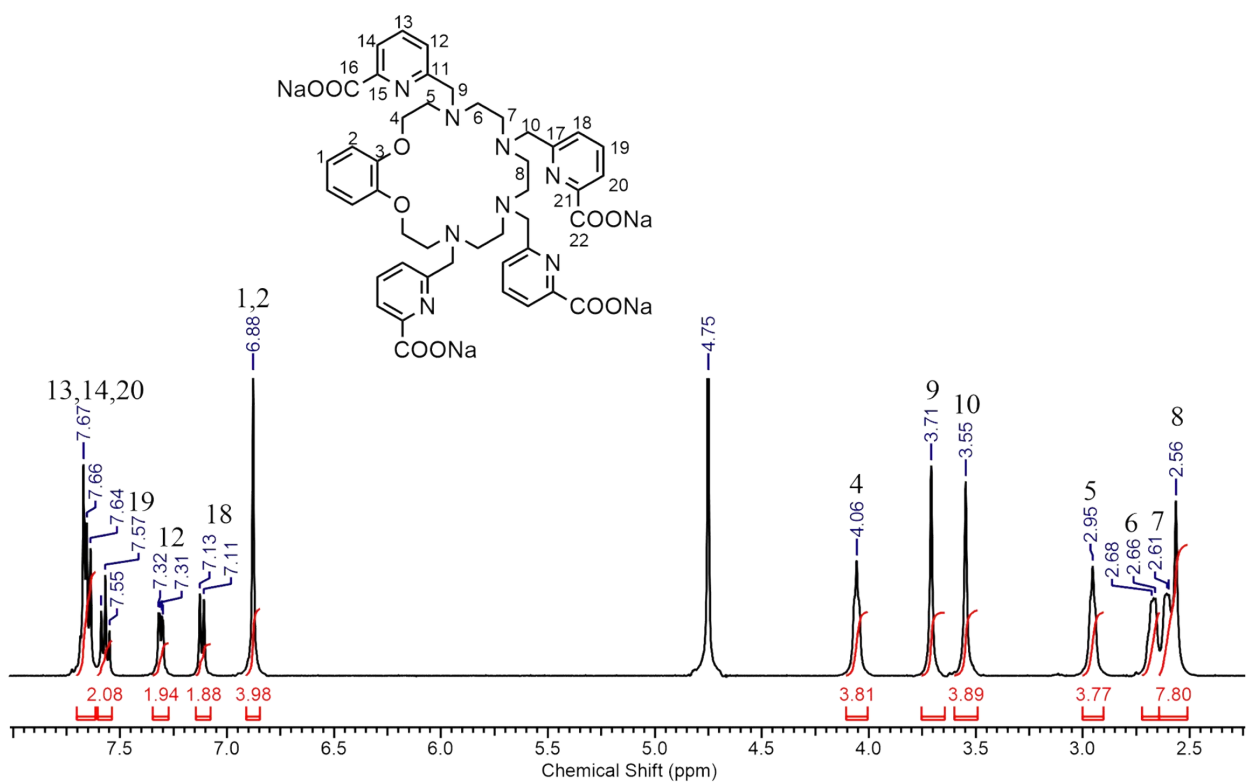

Fig. S13  $^1\text{H}$  NMR spectra of  $\text{H}_4\text{BATPic}$ .

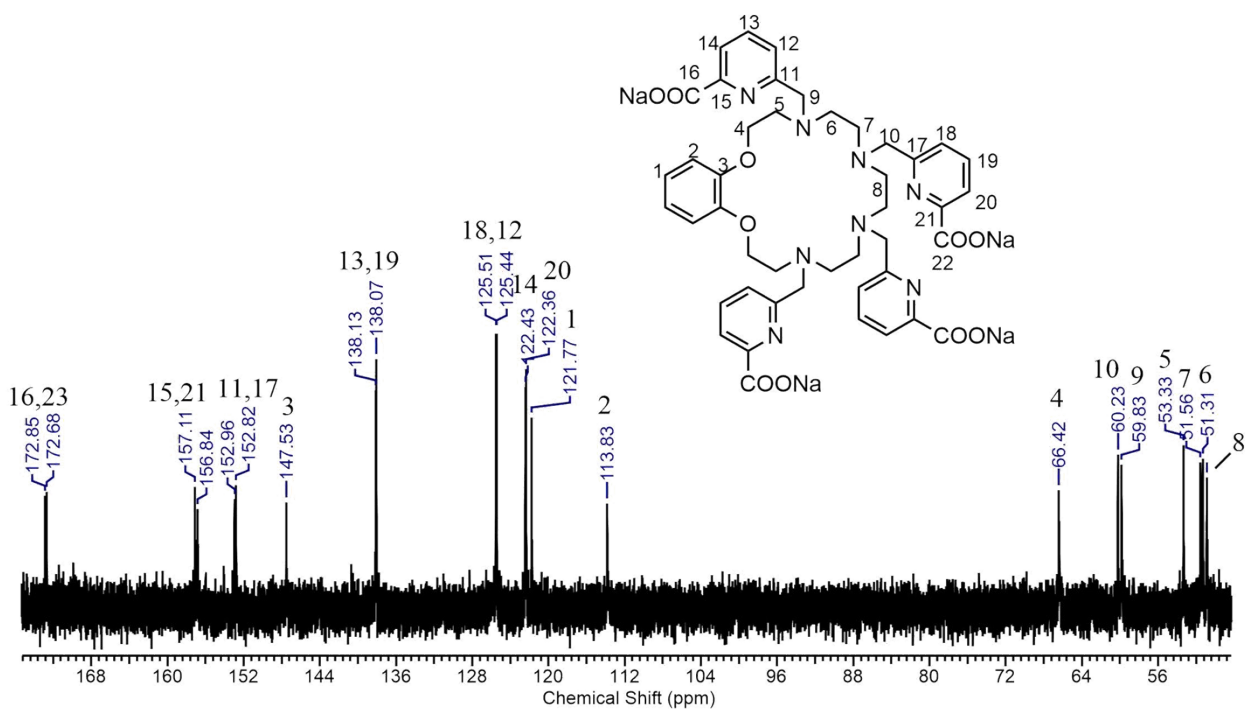

Fig. S14  $^{13}\text{C}$  NMR spectra of  $\text{H}_4\text{BATPic}$ .

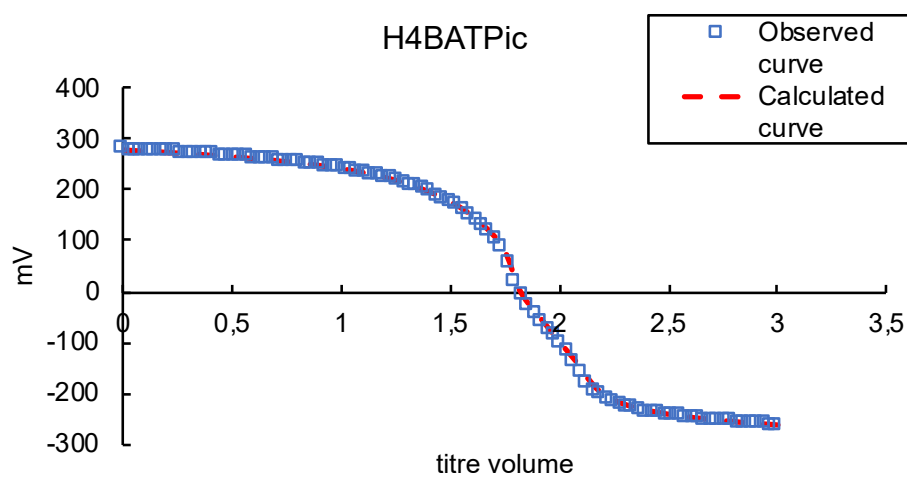

Fig. S15 Potentiometric titration of  $\text{H}_4\text{BATPic}$ : observed data and calculated fitting in HYPERQUAD.

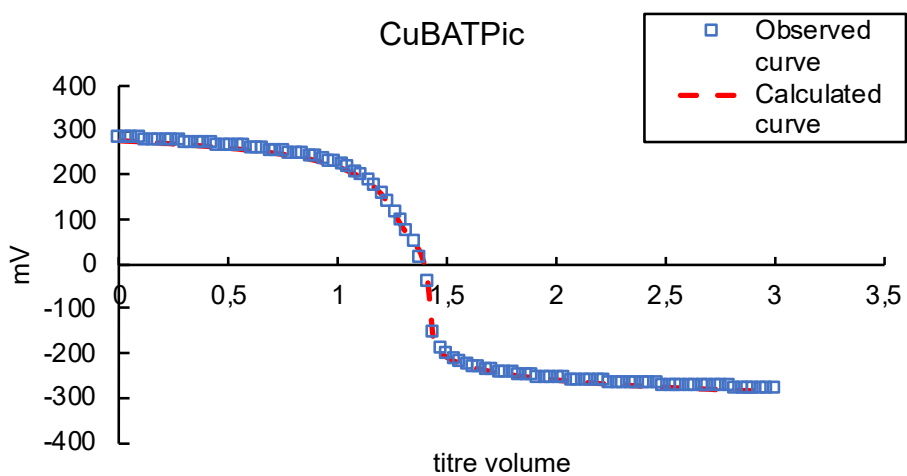

Fig. S16 Potentiometric titration of  $\text{Cu}^{2+}$  with  $\text{H}_4\text{BATPic}$  (equimolar): observed data and calculated fitting in HYPERQUAD.



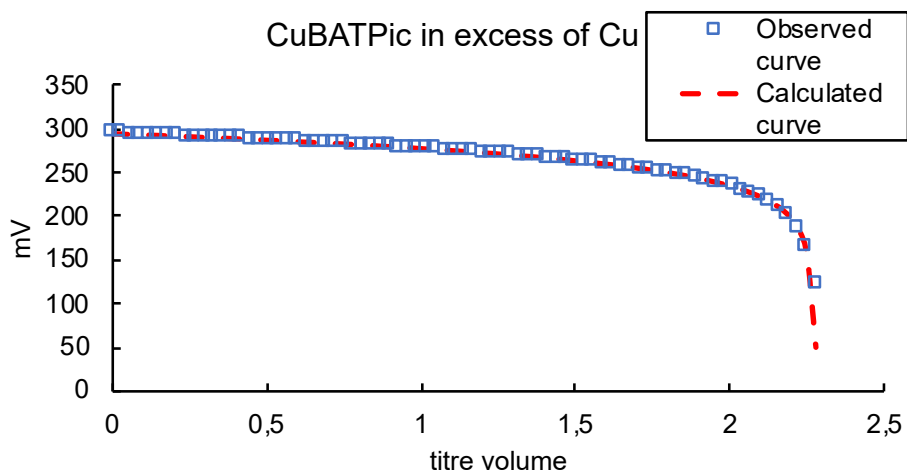

Fig. S17 Potentiometric titration of  $\text{Cu}^{2+}$  (3-fold excess of  $\text{Cu}^{2+}$ ) with  $\text{H}_4\text{BATPic}$ : observed data and calculated fitting in HYPERQUAD.

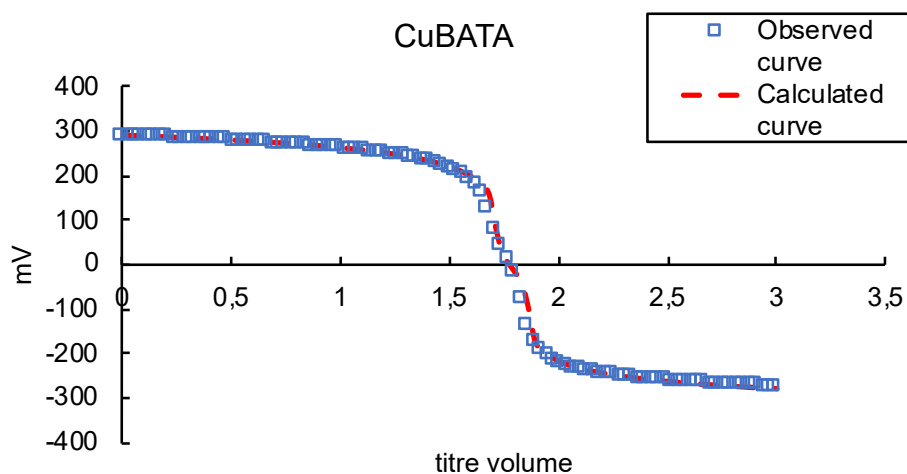

Fig. S18 Potentiometric titration of  $\text{Cu}^{2+}$  with  $\text{H}_4\text{BATA}$  (equimolar): observed data and calculated fitting in HYPERQUAD.

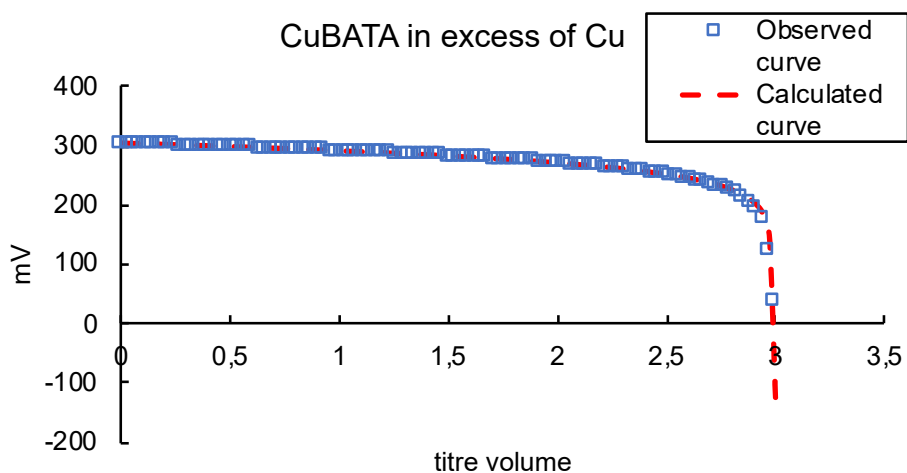

Fig. S19 Potentiometric titration of  $\text{Cu}^{2+}$  (2-fold excess of  $\text{Cu}^{2+}$ ) with  $\text{H}_4\text{BATA}$ : observed data and calculated fitting in HYPERQUAD.

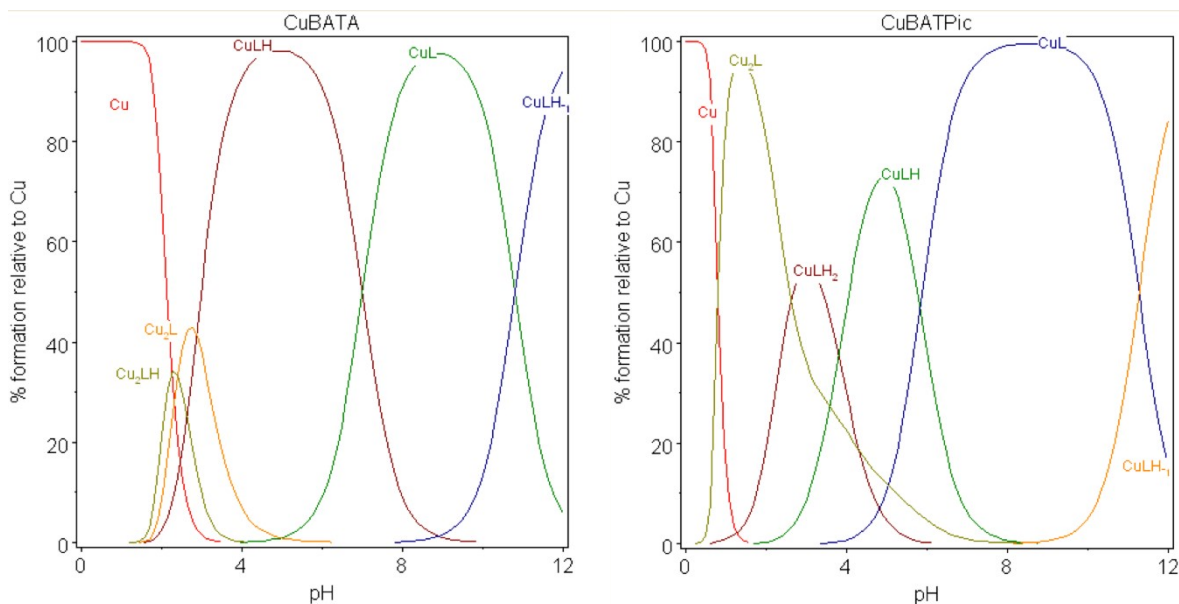

**Fig. S20.** pH distribution diagrams for copper species in the presence of equimolar content of ligand  $c(L)=c(Cu^{2+})=1$  mM: simulated at pH from 0 to 12 with Hyss.

**Table.** Potentiometric titration parameters.

| Titration curve                        | Slope factor | Standard potential, mV | $c(NaOH)$ , M |
|----------------------------------------|--------------|------------------------|---------------|
| H <sub>4</sub> BATPic                  | 1.0046       | 411.3                  | 0.0926        |
| CuBATPic                               | 1.0057       | 410.3                  | 0.107         |
| CuBATPic in excess of Cu <sup>2+</sup> | 1.0055       | 409.3                  | 0.087         |
| CuBATA                                 | 1.0122       | 412.6                  | 0.1025        |
| CuBATA in excess of Cu <sup>2+</sup>   | 1.0078       | 411.87                 | 0.103         |

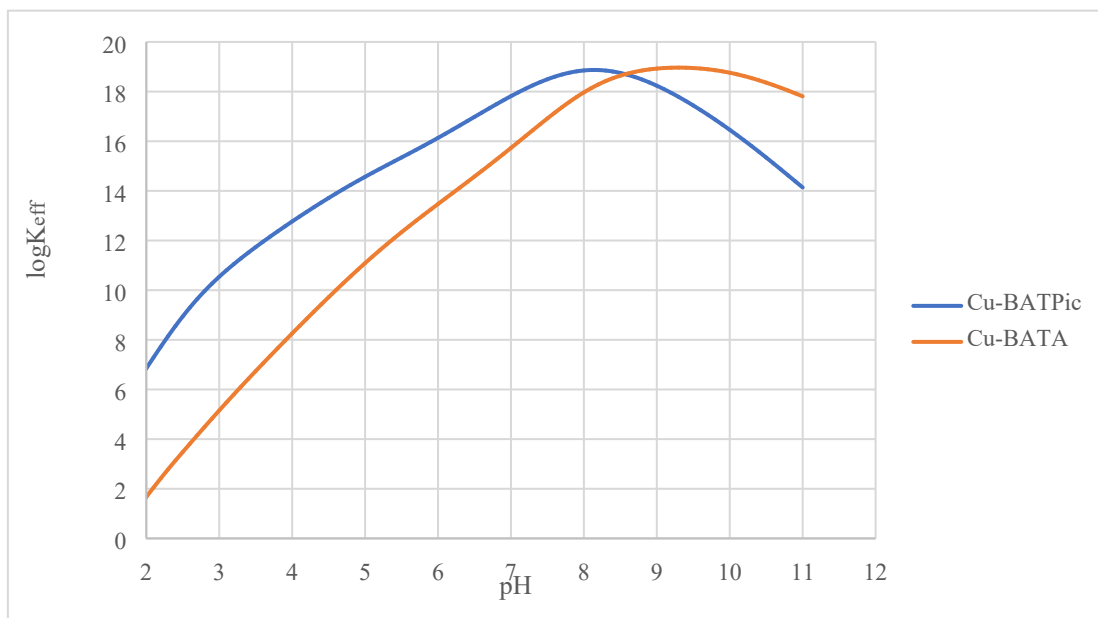

**Fig. S21.** The dependence of  $\log K_{eff}$  from pH for Cu-BATA and Cu-BATPic complexes

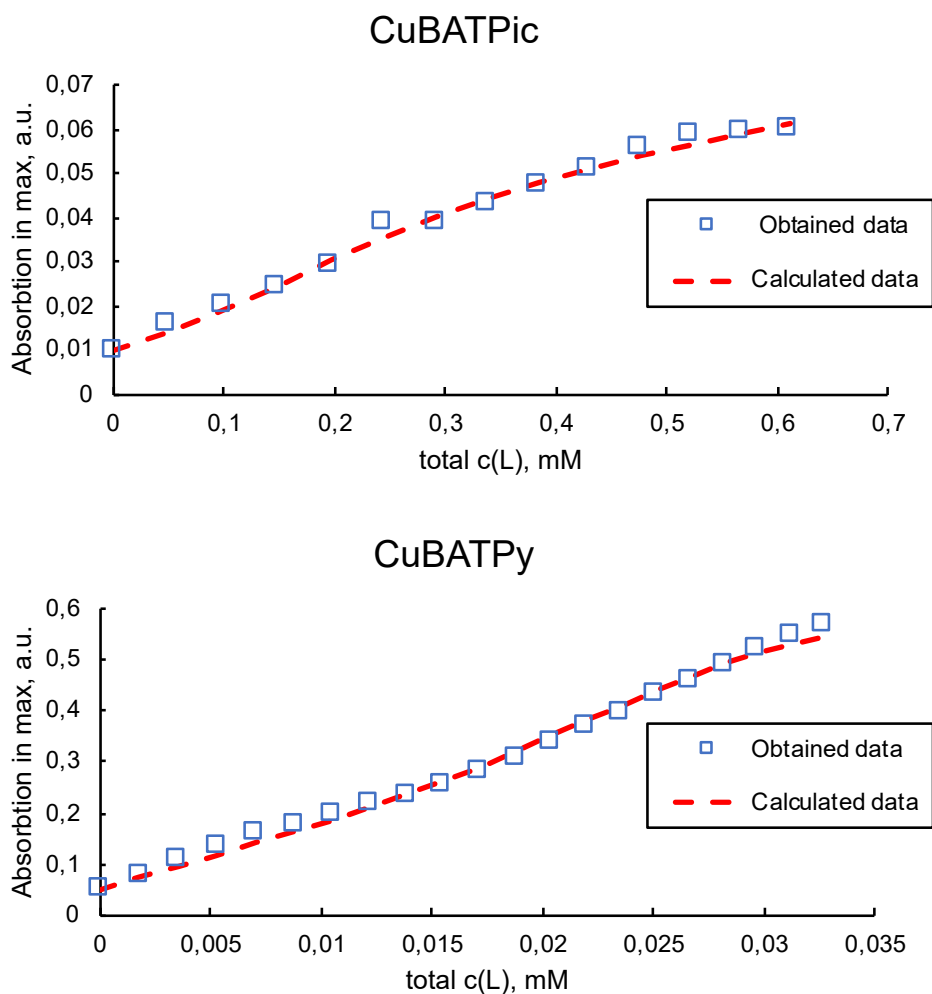

**Fig. S22.** Spectrophotometric titration of  $\text{Cu}^{2+}$  with  $\text{H}_4\text{BATPic}$  ( $c(\text{Cu}^{2+})=0.5 \text{ mM}$ ,  $c(\text{L})=0\div 0.6 \text{ mM}$ ) and  $\text{H}_4\text{BATPy}$  ( $c(\text{Cu}^{2+})=0.03 \text{ mM}$ ,  $c(\text{L})=0\div 0.033 \text{ mM}$ ): observed data and calculated fitting in HYPSPPEC.

**Table.** Spectrophotometric details for Fig S22

| CuBATPic |           |          |            | CuBATPy |          |           |            |
|----------|-----------|----------|------------|---------|----------|-----------|------------|
| Point    | c(Cu), mM | c(L), mM | C(Cu)/C(L) | Point   | c(L), mM | c(Cu), mM | c(Cu)/C(L) |
| 1        | 0,50      | 0,00     |            | 1       | 0,000    | 0,030     |            |
| 2        | 0,50      | 0,05     | 10,00      | 2       | 0,002    | 0,030     | 16,67      |
| 3        | 0,50      | 0,10     | 5,00       | 3       | 0,004    | 0,030     | 8,33       |
| 4        | 0,49      | 0,15     | 3,33       | 4       | 0,005    | 0,030     | 5,56       |
| 5        | 0,49      | 0,20     | 2,50       | 5       | 0,007    | 0,029     | 4,17       |
| 6        | 0,49      | 0,24     | 2,00       | 6       | 0,009    | 0,029     | 3,33       |
| 7        | 0,49      | 0,29     | 1,67       | 7       | 0,010    | 0,029     | 2,78       |
| 8        | 0,48      | 0,34     | 1,43       | 8       | 0,012    | 0,029     | 2,38       |
| 9        | 0,48      | 0,38     | 1,25       | 9       | 0,014    | 0,029     | 2,08       |
| 10       | 0,48      | 0,43     | 1,11       | 10      | 0,016    | 0,029     | 1,85       |
| 11       | 0,48      | 0,48     | 1,00       | 11      | 0,017    | 0,029     | 1,67       |
| 12       | 0,47      | 0,52     | 0,91       | 12      | 0,019    | 0,028     | 1,52       |
| 13       | 0,47      | 0,57     | 0,83       | 13      | 0,020    | 0,028     | 1,39       |
| 14       | 0,47      | 0,61     | 0,77       | 14      | 0,022    | 0,028     | 1,28       |
|          |           |          |            | 15      | 0,024    | 0,028     | 1,19       |
|          |           |          |            | 16      | 0,025    | 0,028     | 1,11       |
|          |           |          |            | 17      | 0,027    | 0,028     | 1,04       |
|          |           |          |            | 18      | 0,028    | 0,028     | 0,98       |
|          |           |          |            | 19      | 0,030    | 0,028     | 0,93       |
|          |           |          |            | 20      | 0,031    | 0,027     | 0,88       |
|          |           |          |            | 21      | 0,033    | 0,027     | 0,83       |

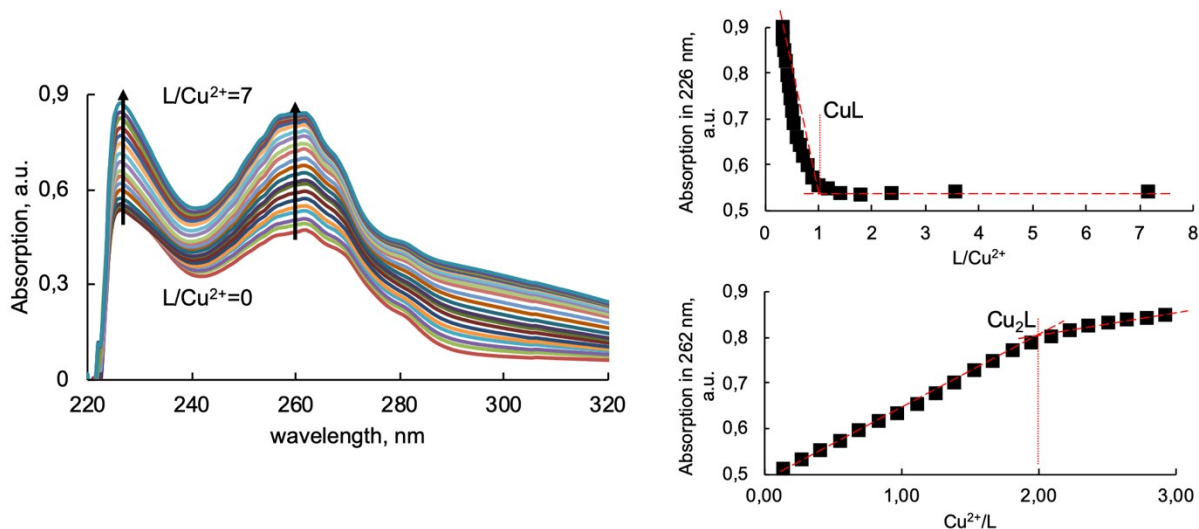

**Fig. S23** Spectrophotometric titration of  $\text{Cu}^{2+}$  with **BATPy**: spectra and functions of absorption at 226 from  $\text{L}/\text{Cu}^{2+}$  ratio and 262 nm from  $\text{Cu}^{2+}/\text{L}$  ratio ( $c(\text{L})_0=4 \times 10^{-5}$  M  $V_0=1.78$  mL,  $\text{Cu}^{2+}$  addition by  $10 \mu\text{L}$ ,  $c(\text{Cu}^{2+})=0.001$  M).

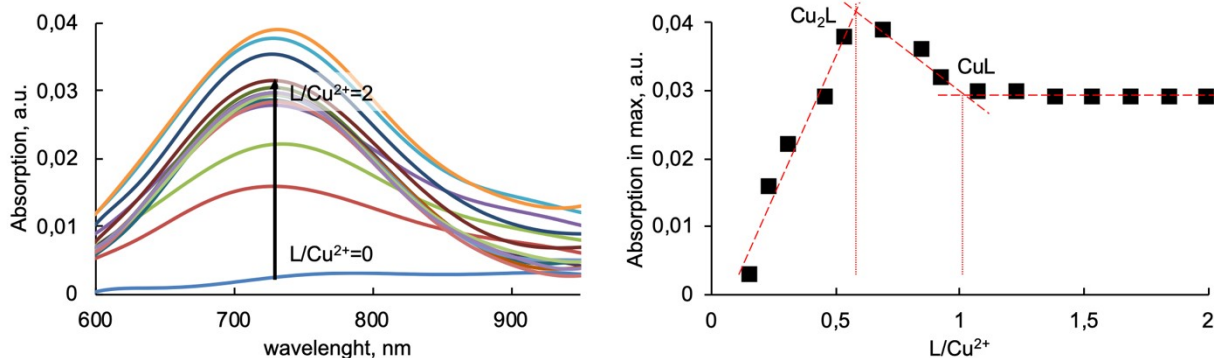

**Fig. S24.** Spectrophotometric titration of  $\text{Cu}^{2+}$  with **H<sub>4</sub>BATPic**: spectra and functions of absorption at 730 from  $\text{L}/\text{Cu}^{2+}$  ratio ( $c(\text{Cu}^{2+})_0=0.001$  M  $V_0=1.5$  mL, L addition by  $10 \mu\text{L}$ ,  $c(\text{L})=0.011$  M)

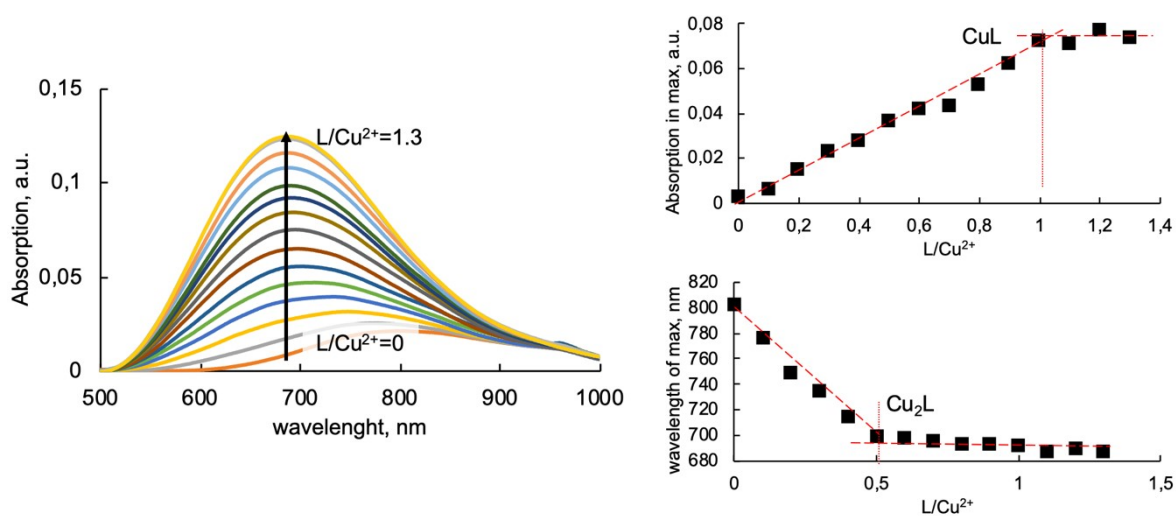

**Fig. S25.** Spectrophotometric titration of  $\text{Cu}^{2+}$  with **H<sub>4</sub>BATA**: spectra and functions of maximum absorption and wavelength of maximum absorption from  $\text{L}/\text{Cu}^{2+}$  ratio ( $c(\text{Cu}^{2+})_0=0.001$  M  $V_0=1.5$  mL, L addition by  $10 \mu\text{L}$ ,  $c(\text{L})=0.03$  M).

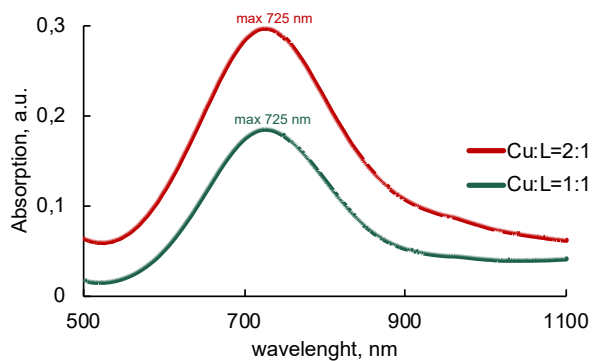

(a)

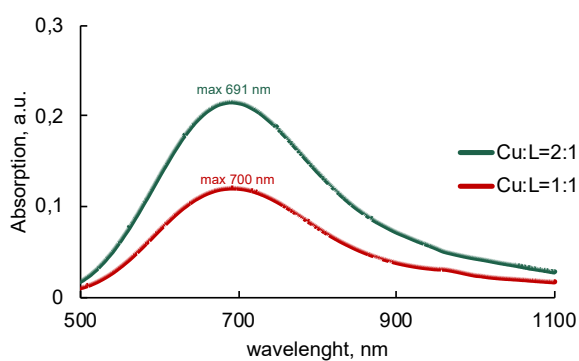

(b)

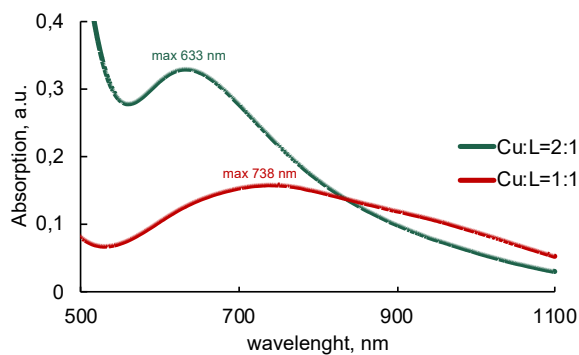

(c)

**Fig. S26.** Spectrophotometric data for Cu:L 1:1 and 2:1 forms: (a) CuBATPic, (b) CuBATA, (c) CuBATPy.

**Table S2.** UV-Vis absorption wavelengths and molar absorptivities for Cu<sup>2+</sup> complexes with H<sub>4</sub>BATPic and H<sub>4</sub>BATA

|                                       | CuBATPic | Cu <sub>2</sub> BATPic | CuBATA | Cu <sub>2</sub> BATA | CuBATPy | Cu <sub>2</sub> BATPy |
|---------------------------------------|----------|------------------------|--------|----------------------|---------|-----------------------|
| λl, nm                                | 725      | 725                    | 692    | 690                  | 738     | 633                   |
| ε, mM <sup>-1</sup> ·cm <sup>-1</sup> | 0.186    | 0.3101                 | 0.115  | 0.208                | 0.1511  | 0.326                 |
| ε(M <sub>2</sub> L)/ ε(ML)            |          | 1.7                    |        | 1.8                  |         | 2.2                   |

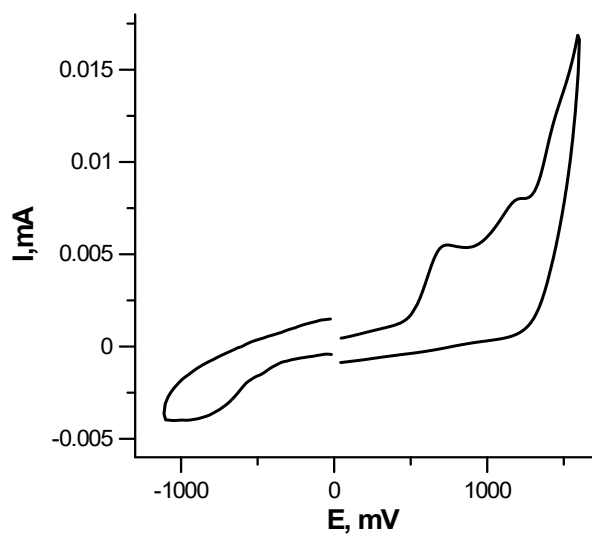

(a)  $\text{CuBATA}^{2-}$

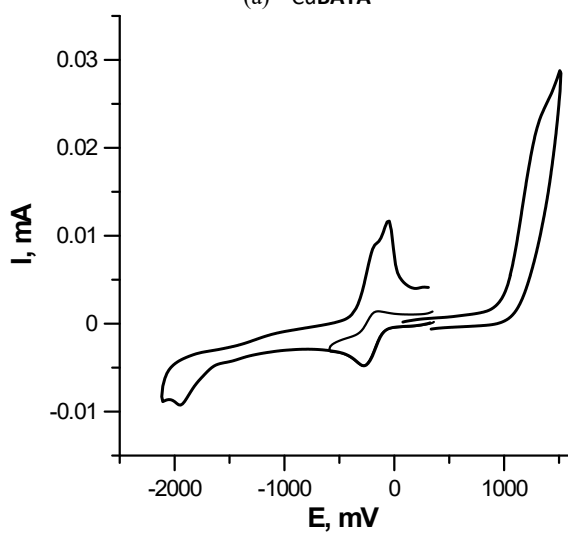

(b)  $\text{CuBATPy}^{2+}$

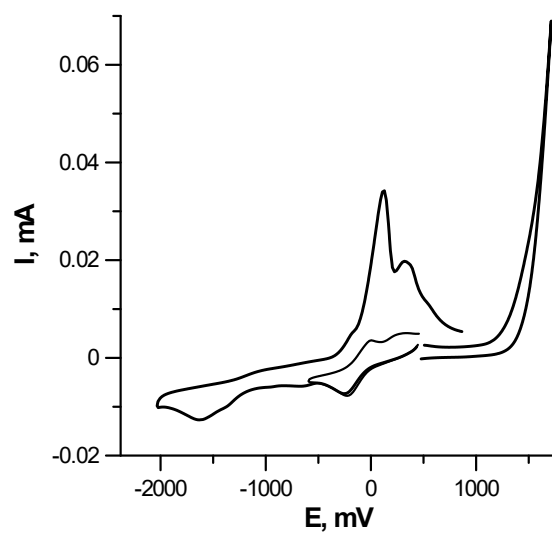

(c)  $\text{Cu}_2\text{BATPy}^{4+}$

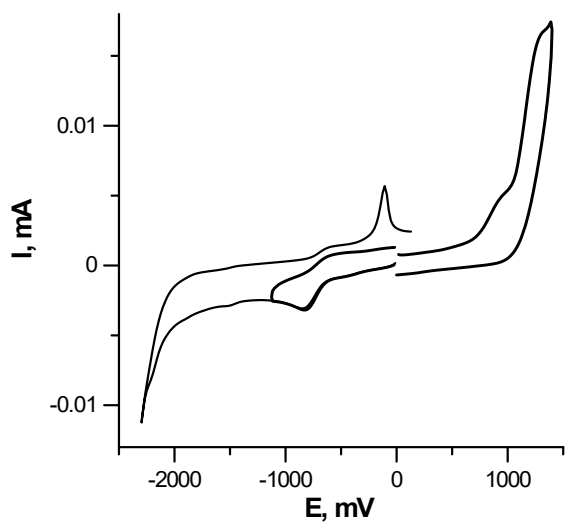

(d)  $\text{CuBATPic}^{2-}$

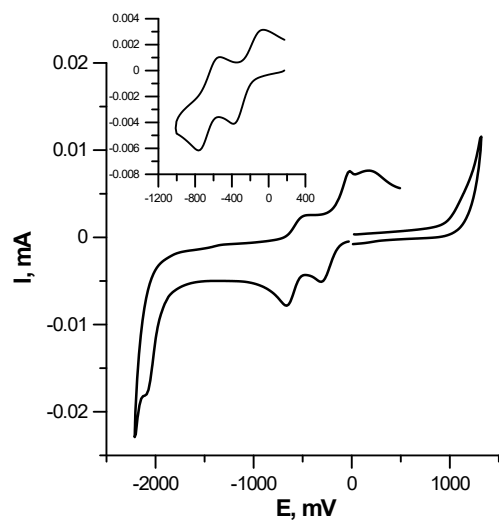

(e)  $\text{Cu}_2\text{BATPic}$

Fig. S27. Cyclic voltammograms: copper complexes of (a)  $\text{H}_4\text{BATA}$ , (b, c)  $\text{BATPy}$ , (d, e)  $\text{H}_4\text{BATPic}$ , GC electrode, 0.1 M  $\text{Bu}_4\text{NClO}_4$ .

**Table S3.** Electrochemical potentials of ligands and complexes 1a–c, 2a–c, and 3a–c in DMSO in the presence of 0.1 M Bu<sub>4</sub>NClO<sub>4</sub> on GC electrodes relative to Ag/AgCl/KCl (sat.). The potential scan rate was 100 mV s<sup>-1</sup>

|    | compound                            | $E_{pc}$ , V                                                | $E_{pa}$ , V           |
|----|-------------------------------------|-------------------------------------------------------------|------------------------|
| 1a | <b>H<sub>4</sub>BATA</b>            | -2.16                                                       | 0.95;<br>1.21          |
| 1b | CuBATA <sup>2-</sup>                | -0.77                                                       | 0.70;<br>1.19;<br>1.43 |
| 1c | Cu <sub>2</sub> BATA                | insoluble                                                   | –                      |
| 2a | <b>Na<sub>4</sub>BATPic</b>         | –                                                           | 0.77;<br>1.32          |
| 2b | CuBATPic <sup>2-</sup>              | -0.83;<br>-2.21/0.11 desorption peak                        | 0.94;<br>1.28          |
| 2c | Cu <sub>2</sub> BATPic              | -0.37/-0.08;<br>-0.76/-0.56;<br>-2.13/-0.03 desorption peak | 1.09                   |
| 3a | <b>BATPy</b>                        | –                                                           | 1.56                   |
| 3b | CuBATPy <sup>2+</sup>               | -0.27/-0.16;<br>-1.95/0.06 desorption peak                  | 1.36                   |
| 3c | Cu <sub>2</sub> BATPy <sup>4+</sup> | -0.23/0; 0.27<br>-1.36;<br>-1.63/0.12 desorption peak       | –                      |

**Table S4.** Biodistribution (% ID/g) of the Cu<sup>2+</sup> complexes with **H<sub>4</sub>BATPic** in mice at 1 and 6 hours after injection

| Tissue           | CuBATPic<br>1hour, % ID/g | Cu blank<br>1hour, % ID/g | CuBATPic<br>6 hours, % ID/g | Cu blank<br>6 hours, % ID/g |
|------------------|---------------------------|---------------------------|-----------------------------|-----------------------------|
| blood            | 1.8±0.5                   | 1.4±0.2                   | 0.7±0.06                    | 1.6±0.6                     |
| heart            | 2.6±0.3                   | 2.2±0.2                   | 2±0.3                       | 3.1±1.2                     |
| lungs            | 6.6±2.9                   | 5±2                       | 2.8±0.3                     | 6.2±1.2                     |
| pancreas         | 1.9±0.8                   | 1.8±0.7                   | 0.8±0.4                     | 3.2±0.9                     |
| spleen           | 2.0±1.6                   | 1.75±0.01                 | 0.8±0.7                     | 1.8±1.4                     |
| liver            | 11.4±1.3                  | 16.6±4.3                  | 6.9±1.6                     | 13.1±0.9                    |
| kidneys          | 4.9±1.7                   | 4.5±0.7                   | 3.0±0.3                     | 5.6±0.5                     |
| femur            | 1.3±0.9                   | 1.3±0.1                   | 0.5±0.2                     | 0.8±0.5                     |
| brain            | 0.3±0.2                   | 0.2±0.1                   | 0.11±0.07                   | 0.3±0.2                     |
| bladder          | 27.2±1.6                  | 4.4±0.3                   | 5.7±4.5                     | 1.2±1.3                     |
| rest of the body | 2.2±0.2                   | 1.5±0.8                   | 1.3±0.4                     | 1.8±0.2                     |

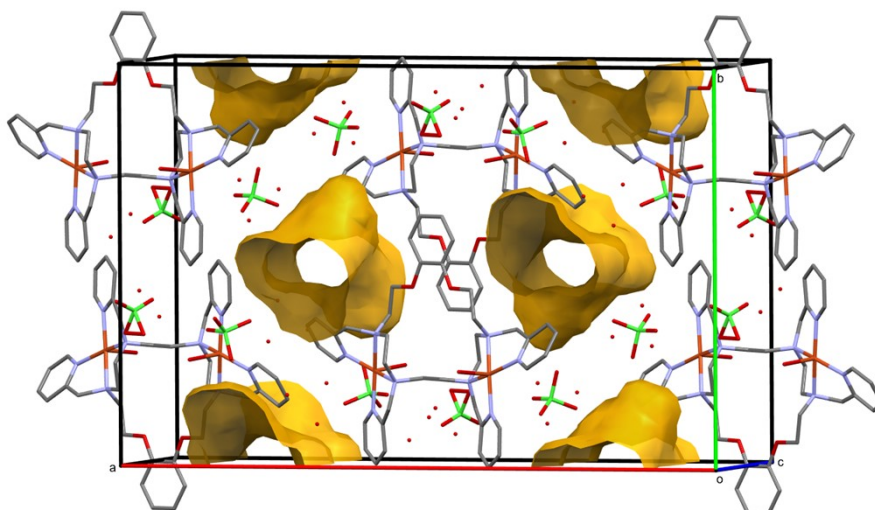

**Fig. S28.** The representation of the squeezed void in the form of infinite channels in the crystal structure  $\text{Cu}_2\text{BATPy}^{4+}$ .

**Table S5.** Selected interatomic distances in calculated geometries of Copper complexes

|       | CuBATA     | Cu <sub>2</sub> BATA | CuBATPic   | Cu <sub>2</sub> BATPic |
|-------|------------|----------------------|------------|------------------------|
| N1    | Cu1-3.96   | Cu1-2.05             | Cu1-2.15   | Cu1-2.11               |
| N2    | Cu1-3.01   | Cu1-2.03             | Cu1-2.02   | Cu1-2.04               |
| N3    |            |                      | Cu1-1.91   | Cu1-1.89               |
| N4    |            |                      | Cu1-2.19ax | Cu1-2.22ax             |
| N7    | Cu1-2.27ax | Cu2-2.03             |            | Cu2-3.09               |
| N8    | Cu1-2.18   | Cu2-2.05             |            | Cu2-2.43ax             |
| N9    |            |                      |            | Cu2-1.96               |
| N10   |            |                      |            | Cu2-1.95               |
| O5    | Cu1-1.95   | Cu1-1.93             | Cu1-2.00   | Cu1-1.96               |
| O6    | Cu1-1.97   | Cu1-1.93             |            |                        |
| O11   |            | Cu2-1.93             |            | Cu2-2.02               |
| O12   | Cu1-2.00   | Cu2-1.93             |            | Cu2-1.99               |
| Ow    |            | Cu1-2.42ax           |            |                        |
| Ow    |            | Cu2-2.42ax           |            |                        |
| Cu-Cu |            | 7.05                 |            | 8.40                   |

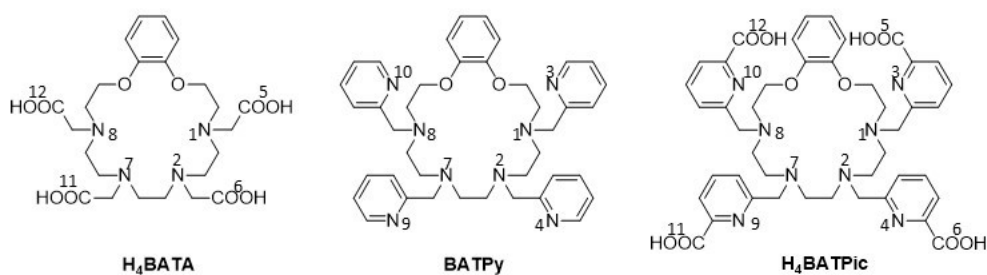

**Fig. S29.** Numbers of atoms used for the Table S5

**Table S6** Coordinates in Angstrom of optimized geometries of complexes



**Cu<sub>2</sub>BATA**

|    |               |               |               |
|----|---------------|---------------|---------------|
| Cu | 12.0620530000 | 4.8318510000  | 0.5478240000  |
| Cu | 18.6328880000 | 4.7627090000  | 3.0966260000  |
| O  | 14.3255890000 | 9.1024810000  | 1.1596020000  |
| O  | 13.0906900000 | 4.7196460000  | -1.6419270000 |
| H  | 12.8575700000 | 3.7828380000  | -1.4970420000 |
| H  | 12.3163570000 | 5.0769660000  | -2.1013310000 |
| N  | 12.3288730000 | 6.7608000000  | 1.2035910000  |
| N  | 13.4301480000 | 4.3088000000  | 1.9587790000  |
| C  | 14.7937780000 | 12.7414950000 | 1.6081330000  |
| H  | 14.3460370000 | 13.6821330000 | 1.3133160000  |
| C  | 14.2220480000 | 11.5439650000 | 1.1708480000  |
| H  | 13.3420620000 | 11.5672670000 | 0.5417120000  |
| C  | 14.7861410000 | 10.3321340000 | 1.5398480000  |
| C  | 13.1363150000 | 9.0392270000  | 0.3777100000  |
| H  | 13.2808940000 | 9.5659590000  | -0.5721670000 |
| H  | 12.3059460000 | 9.5154460000  | 0.9096010000  |
| C  | 12.8692580000 | 7.5734040000  | 0.0857060000  |
| H  | 12.1457830000 | 7.4970510000  | -0.7264610000 |
| H  | 13.7951030000 | 7.1071580000  | -0.2557680000 |
| C  | 13.2004540000 | 6.7101760000  | 2.4066470000  |
| H  | 12.8961690000 | 7.4552150000  | 3.1463000000  |
| H  | 14.2103170000 | 6.9757310000  | 2.1010290000  |
| C  | 13.1649910000 | 5.3129920000  | 3.0140010000  |
| H  | 13.8690020000 | 5.2400580000  | 3.8499050000  |
| H  | 12.1696480000 | 5.0921770000  | 3.4056460000  |
| C  | 14.7633990000 | 4.4068640000  | 1.3226480000  |
| H  | 14.7932900000 | 5.3287740000  | 0.7404740000  |
| H  | 14.8279780000 | 3.5830310000  | 0.6107440000  |
| C  | 10.9115450000 | 7.1001740000  | 1.4752590000  |
| H  | 10.7678660000 | 8.1701170000  | 1.6419670000  |
| H  | 10.5998240000 | 6.5678040000  | 2.3777080000  |
| C  | 13.0885790000 | 2.9095900000  | 2.3031650000  |
| H  | 12.2766480000 | 2.9253210000  | 3.0330710000  |
| H  | 13.9316350000 | 2.3707860000  | 2.7393010000  |
| O  | 16.3867540000 | 9.0650880000  | 2.6850180000  |
| N  | 18.3681730000 | 6.7201690000  | 2.5303510000  |
| N  | 17.2563710000 | 4.3047560000  | 1.6712070000  |
| C  | 15.9225880000 | 12.7219910000 | 2.4087560000  |
| H  | 16.3713430000 | 13.6472450000 | 2.7474190000  |
| C  | 16.4929930000 | 11.5045270000 | 2.7891680000  |
| H  | 17.3727620000 | 11.4970470000 | 3.4189320000  |
| C  | 15.9277340000 | 10.3120000000 | 2.3634040000  |
| C  | 17.5754170000 | 8.9627050000  | 3.4636170000  |
| H  | 17.4314410000 | 9.4440210000  | 4.4374490000  |
| H  | 18.4068080000 | 9.4623570000  | 2.9553600000  |
| C  | 17.8399440000 | 7.4842580000  | 3.6875960000  |
| H  | 18.5693470000 | 7.3704360000  | 4.4900770000  |
| H  | 16.9153350000 | 7.0056120000  | 4.0147890000  |
| C  | 17.4833530000 | 6.7241790000  | 1.3362420000  |
| H  | 17.7759370000 | 7.5050330000  | 0.6296500000  |
| H  | 16.4765380000 | 6.9703100000  | 1.6672440000  |
| C  | 17.5154170000 | 5.3576760000  | 0.6630950000  |
| H  | 16.8062980000 | 5.3245310000  | -0.1709220000 |
| H  | 18.5082360000 | 5.1561830000  | 0.2548990000  |
| C  | 15.9244230000 | 4.3678370000  | 2.3158220000  |
| H  | 15.9009190000 | 5.2450270000  | 2.9642370000  |
| H  | 15.8546990000 | 3.4951470000  | 2.9661270000  |
| C  | 19.7829310000 | 7.0700350000  | 2.2591460000  |
| H  | 19.9267150000 | 8.1468530000  | 2.1458250000  |

|   |               |              |               |
|---|---------------|--------------|---------------|
| H | 20.0830730000 | 6.5846370000 | 1.3268320000  |
| C | 17.5969100000 | 2.9235910000 | 1.2594200000  |
| H | 18.4065070000 | 2.9730680000 | 0.5283670000  |
| H | 16.7514080000 | 2.4071540000 | 0.8010640000  |
| O | 17.6226090000 | 4.5567200000 | 5.2849680000  |
| H | 17.8517520000 | 3.6269500000 | 5.0945820000  |
| H | 18.3985790000 | 4.8889450000 | 5.7600050000  |
| C | 10.0346120000 | 6.6163560000 | 0.2934760000  |
| O | 9.0303660000  | 7.2379090000 | 0.0034640000  |
| O | 10.4798740000 | 5.5428240000 | -0.2921870000 |
| C | 12.5839780000 | 2.1682620000 | 1.0424590000  |
| O | 12.7212210000 | 0.9656360000 | 0.9604670000  |
| O | 12.0117470000 | 2.9392910000 | 0.1582500000  |
| C | 18.1045450000 | 2.1241700000 | 2.4831160000  |
| O | 17.9679300000 | 0.9189250000 | 2.5093370000  |
| O | 18.6782350000 | 2.8535140000 | 3.4011980000  |
| C | 20.6737280000 | 6.5253750000 | 3.4034330000  |
| O | 21.6856170000 | 7.1275550000 | 3.7077420000  |
| O | 20.2319970000 | 5.4266400000 | 3.9428110000  |

**Cu<sub>2</sub>BATPy<sup>4+</sup>**

|    |               |               |               |
|----|---------------|---------------|---------------|
| Cu | 12.0266800000 | 4.8094810000  | 0.5748570000  |
| Cu | 18.7397020000 | 4.7597590000  | 3.3900270000  |
| O  | 14.2461580000 | 9.1121390000  | 1.3986950000  |
| O  | 13.2291440000 | 5.0705240000  | -1.4276060000 |
| H  | 13.4557970000 | 4.2829010000  | -1.9419670000 |
| H  | 13.0024090000 | 5.7412900000  | -2.0879160000 |
| N  | 12.2827360000 | 6.7298890000  | 1.3464270000  |
| N  | 13.4422160000 | 4.2309080000  | 2.0244000000  |
| N  | 10.1987980000 | 5.5243040000  | 0.1099940000  |
| N  | 11.9865200000 | 2.8220510000  | 0.2395290000  |
| C  | 14.7995660000 | 12.7574230000 | 1.7225910000  |
| H  | 14.3163020000 | 13.6949760000 | 1.4810540000  |
| C  | 14.1727330000 | 11.5578520000 | 1.3931860000  |
| H  | 13.2098870000 | 11.5864990000 | 0.9015150000  |
| C  | 14.7826360000 | 10.3483710000 | 1.6966360000  |
| C  | 13.0192120000 | 9.1038330000  | 0.6795750000  |
| H  | 13.1093570000 | 9.6987260000  | -0.2356020000 |
| H  | 12.2162710000 | 9.5399350000  | 1.2840460000  |
| C  | 12.7255930000 | 7.6686630000  | 0.2707660000  |
| H  | 11.9333630000 | 7.6763370000  | -0.4802320000 |
| H  | 13.6246580000 | 7.2445950000  | -0.1777470000 |
| C  | 13.2541760000 | 6.6370280000  | 2.4739040000  |
| H  | 13.0461350000 | 7.3947140000  | 3.2325970000  |
| H  | 14.2415720000 | 6.8634990000  | 2.0770160000  |
| C  | 13.1945520000 | 5.2492930000  | 3.0801310000  |
| H  | 13.8933980000 | 5.1589710000  | 3.9165280000  |
| H  | 12.1985610000 | 5.0480720000  | 3.4791390000  |
| C  | 14.8178050000 | 4.2594040000  | 1.4523370000  |
| H  | 14.8957030000 | 5.1569100000  | 0.8396680000  |
| H  | 14.8905160000 | 3.4054740000  | 0.7765610000  |
| C  | 10.9145400000 | 7.0602780000  | 1.8286280000  |
| H  | 10.8257530000 | 8.1240260000  | 2.0612690000  |
| H  | 10.7446450000 | 6.5138940000  | 2.7608510000  |
| C  | 9.8908790000  | 6.6373550000  | 0.8123010000  |
| C  | 8.6891190000  | 7.3033250000  | 0.6372910000  |
| H  | 8.4741950000  | 8.1951850000  | 1.2130770000  |
| C  | 7.7654650000  | 6.8061210000  | -0.2776990000 |
| H  | 6.8176980000  | 7.3086260000  | -0.4281560000 |
| C  | 8.0807600000  | 5.6577510000  | -0.9947580000 |

|   |               |               |               |
|---|---------------|---------------|---------------|
| H | 7.3926220000  | 5.2359080000  | -1.7155810000 |
| C | 9.3052660000  | 5.0494340000  | -0.7744530000 |
| H | 9.5813250000  | 4.1548700000  | -1.3136020000 |
| C | 13.0213280000 | 2.8659890000  | 2.4297110000  |
| H | 12.2095050000 | 2.9702430000  | 3.1543230000  |
| H | 13.8283380000 | 2.3253840000  | 2.9320590000  |
| C | 12.5213140000 | 2.0886400000  | 1.2373950000  |
| C | 12.5503000000 | 0.7031200000  | 1.1874310000  |
| H | 12.9744980000 | 0.1399760000  | 2.0099280000  |
| C | 12.0114140000 | 0.0504180000  | 0.0831490000  |
| H | 12.0099330000 | -1.0315680000 | 0.0307900000  |
| C | 11.4820100000 | 0.8097340000  | -0.9549170000 |
| H | 11.0647750000 | 0.3450030000  | -1.8388310000 |
| C | 11.4932170000 | 2.1894190000  | -0.8398480000 |
| H | 11.1046050000 | 2.8159720000  | -1.6319200000 |
| O | 16.5558480000 | 9.0933320000  | 2.6307820000  |
| N | 18.4982850000 | 6.6937840000  | 2.6478620000  |
| N | 17.3229530000 | 4.2141640000  | 1.9285520000  |
| N | 20.5716620000 | 5.4558010000  | 3.8687440000  |
| N | 18.7691570000 | 2.7657080000  | 3.6885570000  |
| C | 16.0359020000 | 12.7475970000 | 2.3549910000  |
| H | 16.5277040000 | 13.6774200000 | 2.6088670000  |
| C | 16.6517190000 | 11.5381020000 | 2.6685920000  |
| H | 17.6147560000 | 11.5514920000 | 3.1605370000  |
| C | 16.0308130000 | 10.3383450000 | 2.3493020000  |
| C | 17.7829390000 | 9.0639720000  | 3.3490790000  |
| H | 17.6987040000 | 9.6467910000  | 4.2725500000  |
| H | 18.5894950000 | 9.5012190000  | 2.7502580000  |
| C | 18.0641520000 | 7.6205880000  | 3.7373730000  |
| H | 18.8569600000 | 7.6108050000  | 4.4876960000  |
| H | 17.1616060000 | 7.1977980000  | 4.1801270000  |
| C | 17.5255090000 | 6.6264980000  | 1.5197930000  |
| H | 17.7381760000 | 7.3956350000  | 0.7740400000  |
| H | 16.5400560000 | 6.8528290000  | 1.9216860000  |
| C | 17.5759720000 | 5.2489280000  | 0.8902600000  |
| H | 16.8761070000 | 5.1768630000  | 0.0529880000  |
| H | 18.5703410000 | 5.0484790000  | 0.4869050000  |
| C | 15.9473090000 | 4.2399320000  | 2.5013100000  |
| H | 15.8778420000 | 5.1211030000  | 3.1384950000  |
| H | 15.8661460000 | 3.3684830000  | 3.1532620000  |
| C | 19.8689650000 | 7.0197340000  | 2.1698970000  |
| H | 19.9662960000 | 8.0858500000  | 1.9518480000  |
| H | 20.0346790000 | 6.4849250000  | 1.2302520000  |
| C | 20.8889040000 | 6.5750650000  | 3.1805960000  |
| C | 22.0957830000 | 7.2292320000  | 3.3644480000  |
| H | 22.3182000000 | 8.1265340000  | 2.8000400000  |
| C | 23.0148420000 | 6.7135270000  | 4.2737640000  |
| H | 23.9664920000 | 7.2065470000  | 4.4309290000  |
| C | 22.6898560000 | 5.5590770000  | 4.9766140000  |
| H | 23.3740050000 | 5.1230410000  | 5.6927650000  |
| C | 21.4606820000 | 4.9632060000  | 4.7480530000  |
| H | 21.1768190000 | 4.0643910000  | 5.2759650000  |
| C | 17.7358830000 | 2.8544800000  | 1.4986250000  |
| H | 18.5476510000 | 2.9668250000  | 0.7751240000  |
| H | 16.9252310000 | 2.3276430000  | 0.9874440000  |
| C | 18.2326980000 | 2.0533340000  | 2.6763410000  |
| C | 18.1996180000 | 0.6672020000  | 2.6992490000  |
| H | 17.7742780000 | 0.1214590000  | 1.8656740000  |
| C | 18.7358910000 | -0.0085050000 | 3.7908310000  |
| H | 18.7343060000 | -1.0913100000 | 3.8219340000  |
| C | 19.2667370000 | 0.7288630000  | 4.8438800000  |

|   |               |              |              |
|---|---------------|--------------|--------------|
| H | 19.6820230000 | 0.2457510000 | 5.7188040000 |
| C | 19.2597000000 | 2.1105490000 | 4.7557240000 |
| H | 19.6496150000 | 2.7201960000 | 5.5602310000 |
| O | 17.5367620000 | 4.9961320000 | 5.3938860000 |
| H | 17.3048160000 | 4.2021980000 | 5.8960620000 |
| H | 17.7679250000 | 5.6551770000 | 6.0643790000 |

**Cu<sub>2</sub>BATPic**

|    |               |               |               |
|----|---------------|---------------|---------------|
| Cu | 1.5428750000  | 26.1698940000 | 20.7727280000 |
| Cu | 0.8688760000  | 21.4989080000 | 13.8243230000 |
| C  | -1.0834030000 | 24.3747620000 | 11.4800010000 |
| H  | -0.8499250000 | 25.3326360000 | 11.0316840000 |
| C  | -2.3477320000 | 23.8026710000 | 11.3372320000 |
| C  | -2.6484270000 | 22.6097390000 | 11.9851870000 |
| O  | -2.9216990000 | 20.2407010000 | 13.6826750000 |
| N  | -0.4234950000 | 22.5293120000 | 12.7853710000 |
| H  | 3.4731880000  | 23.0243050000 | 13.4353600000 |
| H  | 3.6019620000  | 25.4479430000 | 12.8391330000 |
| H  | 4.9036790000  | 24.8852190000 | 13.9039090000 |
| C  | 4.5578770000  | 27.7964360000 | 13.5113310000 |
| H  | 5.0884330000  | 27.0726730000 | 12.9070550000 |
| C  | 4.7457140000  | 29.1607570000 | 13.2805900000 |
| H  | 5.4154630000  | 29.4790550000 | 12.4915260000 |
| C  | 1.2617860000  | 24.2004800000 | 12.5456650000 |
| H  | 1.9732010000  | 23.7090790000 | 11.8743370000 |
| H  | 1.3163140000  | 25.2845950000 | 12.3795070000 |
| C  | -0.1256370000 | 23.7047040000 | 12.2289350000 |
| C  | -1.6480040000 | 22.0010760000 | 12.7288190000 |
| C  | -1.8400420000 | 20.8039550000 | 13.6455010000 |
| O  | 2.2504580000  | 27.8022650000 | 16.3089520000 |
| O  | 3.4463800000  | 26.0580660000 | 14.8108090000 |
| O  | -1.4466980000 | 25.0891660000 | 23.1305570000 |
| O  | 0.2625180000  | 24.9824940000 | 21.6685360000 |
| O  | 2.6117990000  | 28.1807680000 | 23.6968960000 |
| O  | 4.2438650000  | 28.7395200000 | 22.2182100000 |
| O  | 2.3446960000  | 21.1594140000 | 12.4936920000 |
| O  | 4.2242040000  | 19.9266910000 | 12.3142010000 |
| O  | -0.7944660000 | 20.5442150000 | 14.3691270000 |
| N  | 2.0420560000  | 27.7781080000 | 19.4988050000 |
| N  | 2.5134640000  | 24.9520330000 | 19.4488610000 |
| N  | 1.1753400000  | 22.7070400000 | 16.6549380000 |
| N  | 1.6201910000  | 23.8040180000 | 13.9155150000 |
| N  | 0.4955060000  | 27.5366860000 | 21.5619570000 |
| N  | 3.4790410000  | 25.8378690000 | 21.7986540000 |
| N  | 2.0917080000  | 20.5696510000 | 15.0395290000 |
| C  | 4.0800520000  | 30.0937190000 | 14.0561120000 |
| H  | 4.2148080000  | 31.1533890000 | 13.8791340000 |
| C  | 3.2273250000  | 29.6724470000 | 15.0788220000 |
| H  | 2.7042950000  | 30.4084860000 | 15.6745800000 |
| C  | 3.0444400000  | 28.3185610000 | 15.3223740000 |
| C  | 1.5841880000  | 28.7038650000 | 17.1925800000 |
| H  | 2.2719470000  | 29.4855670000 | 17.5323480000 |
| H  | 0.7494300000  | 29.1801540000 | 16.6672510000 |
| C  | 1.0903600000  | 27.8716020000 | 18.3698350000 |
| H  | 0.8559340000  | 26.8750030000 | 17.9951930000 |
| H  | 0.1677050000  | 28.2911100000 | 18.7725970000 |
| C  | 3.4046670000  | 27.3343590000 | 19.1417180000 |
| H  | 3.8514050000  | 27.9543010000 | 18.3555390000 |
| H  | 4.0086290000  | 27.4380720000 | 20.0416220000 |
| C  | 3.3635280000  | 25.8860140000 | 18.6279540000 |

|   |               |               |               |
|---|---------------|---------------|---------------|
| H | 4.3856760000  | 25.5038980000 | 18.5749180000 |
| H | 2.9657560000  | 25.8935870000 | 17.6146490000 |
| C | 1.5191660000  | 24.2164120000 | 18.6233460000 |
| H | 0.9013210000  | 23.6320780000 | 19.3068740000 |
| H | 0.8687460000  | 24.9589060000 | 18.1610870000 |
| C | 2.1408650000  | 23.3453030000 | 17.5256320000 |
| H | 2.7576180000  | 22.5580850000 | 17.9646340000 |
| H | 2.8161480000  | 23.9735490000 | 16.9352110000 |
| C | 0.1997320000  | 23.5379790000 | 15.9764290000 |
| H | -0.4813440000 | 22.8655870000 | 15.4517410000 |
| H | -0.4208360000 | 24.1374220000 | 16.6639600000 |
| C | 0.8375070000  | 24.4994620000 | 14.9665390000 |
| H | 0.0269870000  | 25.0562640000 | 14.4883770000 |
| H | 1.4631600000  | 25.2372760000 | 15.4711970000 |
| C | 3.0746780000  | 23.7800430000 | 14.1164480000 |
| H | 3.2651780000  | 23.4354920000 | 15.1312240000 |
| C | 3.8253870000  | 25.0734310000 | 13.8430180000 |
| C | 3.7060880000  | 27.3668480000 | 14.5199510000 |
| C | 1.9440020000  | 28.9928850000 | 20.3575430000 |
| H | 2.8700840000  | 29.0902460000 | 20.9454470000 |
| H | 1.8199330000  | 29.8973570000 | 19.7528830000 |
| C | 0.7918610000  | 28.8122420000 | 21.3214030000 |
| C | 0.0816610000  | 29.7979550000 | 21.9936610000 |
| H | 0.3026630000  | 30.8450400000 | 21.8308250000 |
| C | -0.8975130000 | 29.4044540000 | 22.9045070000 |
| H | -1.4475390000 | 30.1614530000 | 23.4509640000 |
| C | -1.1764580000 | 28.0561550000 | 23.1224700000 |
| H | -1.9338300000 | 27.7228410000 | 23.8190540000 |
| C | -0.4426120000 | 27.1231060000 | 22.4096880000 |
| C | -0.5842110000 | 25.6063230000 | 22.4415480000 |
| C | 3.2915870000  | 23.9920610000 | 20.2654610000 |
| H | 2.5714420000  | 23.2724510000 | 20.6661880000 |
| H | 4.0140430000  | 23.4452990000 | 19.6491410000 |
| C | 4.0013280000  | 24.6692950000 | 21.4069590000 |
| C | 5.1040900000  | 24.1006700000 | 22.0209480000 |
| H | 5.5055300000  | 23.1574580000 | 21.6699230000 |
| C | 5.6723570000  | 24.7734800000 | 23.1027530000 |
| H | 6.5231670000  | 24.3476110000 | 23.6224330000 |
| C | 5.1620010000  | 26.0021880000 | 23.4815100000 |
| H | 5.6062720000  | 26.5744910000 | 24.2854120000 |
| C | 4.0724860000  | 26.5329650000 | 22.7860400000 |
| C | 3.5818670000  | 27.9594070000 | 22.9611650000 |
| C | 0.8496190000  | 21.3204320000 | 16.9627480000 |
| H | 0.7637670000  | 21.1331720000 | 18.0401200000 |
| H | -0.1058150000 | 21.0666560000 | 16.4993800000 |
| C | 1.9209320000  | 20.4354540000 | 16.3641130000 |
| C | 2.7632690000  | 19.6046510000 | 17.0880360000 |
| H | 2.6142210000  | 19.4890170000 | 18.1548670000 |
| C | 3.7980010000  | 18.9388210000 | 16.4294230000 |
| H | 4.4613610000  | 18.2856200000 | 16.9844780000 |
| C | 3.9878540000  | 19.1420230000 | 15.0704970000 |
| H | 4.7950850000  | 18.6887530000 | 14.5109130000 |
| C | 3.1030890000  | 19.9765190000 | 14.3979170000 |
| C | 3.2559440000  | 20.3544700000 | 12.9281920000 |
| H | -3.1049290000 | 24.3108880000 | 10.7517870000 |
| H | -3.6298890000 | 22.1552730000 | 11.9571080000 |

**CuBATA<sup>2-</sup>**

|    |               |               |               |
|----|---------------|---------------|---------------|
| Cu | 0.7923600000  | -1.1558740000 | -1.4701180000 |
| C  | -1.5896650000 | 3.1067180000  | 0.4152740000  |

|   |               |               |               |
|---|---------------|---------------|---------------|
| C | -1.1482360000 | 4.1795340000  | -0.3466860000 |
| C | 0.1147030000  | 4.1324990000  | -0.9193390000 |
| C | 0.9082330000  | 3.0092710000  | -0.7173210000 |
| C | 0.4797400000  | 1.9285140000  | 0.0515900000  |
| C | -0.8124700000 | 1.9652180000  | 0.6344290000  |
| O | -1.4380200000 | 1.0274350000  | 1.3844860000  |
| O | 1.2498030000  | 0.8221410000  | 0.2449240000  |
| C | -0.7978020000 | -0.1470090000 | 1.9371500000  |
| C | -1.8507900000 | -1.2301690000 | 2.1515800000  |
| C | 2.6631000000  | 0.8728030000  | 0.0465770000  |
| C | 3.1197080000  | 0.4756270000  | -1.3555970000 |
| N | -2.2349090000 | -1.9375310000 | 0.9583870000  |
| N | 2.9542180000  | -0.9615950000 | -1.6575850000 |
| N | -0.6943380000 | -3.7291830000 | -0.9873470000 |
| N | 1.0759690000  | -2.5505460000 | -3.2397470000 |
| C | -2.2851090000 | -3.3730090000 | 0.9511440000  |
| C | -2.0091120000 | -3.9996910000 | -0.4235410000 |
| C | 3.2222110000  | -1.2059650000 | -3.0969170000 |
| C | 2.4968950000  | -2.4510240000 | -3.6294140000 |
| C | -0.6263790000 | -4.2156050000 | -2.3573870000 |
| C | 0.6925890000  | -3.9605130000 | -3.0810320000 |
| C | -3.0017450000 | -1.2654910000 | -0.0620210000 |
| C | -2.1502990000 | -1.1311610000 | -1.3442890000 |
| C | 0.3718670000  | -4.1607800000 | -0.0945200000 |
| C | 0.8033470000  | -3.0462790000 | 0.8600060000  |
| C | 0.2092620000  | -1.8312970000 | -4.1841350000 |
| C | 0.4717490000  | -0.3214010000 | -4.1487600000 |
| C | 3.8413270000  | -1.7636020000 | -0.7573800000 |
| C | 4.2586610000  | -3.1454300000 | -1.3183570000 |
| O | -1.0288400000 | -0.5853390000 | -1.0927450000 |
| O | -2.5835970000 | -1.5478760000 | -2.4291080000 |
| O | 1.1049640000  | -1.9259420000 | 0.3123730000  |
| O | 0.4118110000  | 0.3339120000  | -5.1925800000 |
| O | 0.7422060000  | 0.1519760000  | -2.9839570000 |
| O | 3.4937010000  | -4.1163850000 | -1.0920170000 |
| H | -2.5745880000 | 3.1126030000  | 0.8688490000  |
| H | -1.7958000000 | 5.0371800000  | -0.4965250000 |
| H | 0.4768240000  | 4.9403830000  | -1.5452930000 |
| H | 1.8700000000  | 2.9467970000  | -1.2081450000 |
| H | -0.3745190000 | 0.1438460000  | 2.9085630000  |
| H | -0.0182030000 | -0.5238150000 | 1.2885280000  |
| H | -1.3868310000 | -1.9554480000 | 2.8250840000  |
| H | -2.7209440000 | -0.7869910000 | 2.6792240000  |
| H | 3.0288340000  | 1.8814200000  | 0.2696460000  |
| H | 3.0617930000  | 0.1806270000  | 0.7885970000  |
| H | 4.1856080000  | 0.7517260000  | -1.4400470000 |
| H | 2.5460420000  | 1.0247860000  | -2.1023740000 |
| H | -3.2849080000 | -3.7669200000 | 1.2520320000  |
| H | -1.5602560000 | -3.7461570000 | 1.6783360000  |
| H | -2.7551390000 | -3.6525990000 | -1.1426160000 |
| H | -2.1603790000 | -5.0953090000 | -0.2973790000 |
| H | 2.9016750000  | -0.3203270000 | -3.6396130000 |
| H | 4.2962800000  | -1.3564600000 | -3.2544060000 |
| H | 2.5893130000  | -2.4423930000 | -4.7264780000 |
| H | 3.0046910000  | -3.3410890000 | -3.2680880000 |
| H | -0.7901240000 | -5.3143370000 | -2.4115450000 |
| H | -1.4537880000 | -3.7412680000 | -2.8928520000 |
| H | 1.5109310000  | -4.4472320000 | -2.5491860000 |
| H | 0.6158050000  | -4.4495230000 | -4.0690820000 |
| H | -3.9336540000 | -1.8075560000 | -0.2871240000 |
| H | -3.2577090000 | -0.2607320000 | 0.2834890000  |

|   |               |               |               |
|---|---------------|---------------|---------------|
| H | 1.2747350000  | -4.4047640000 | -0.6568180000 |
| H | 0.0803700000  | -5.0461570000 | 0.4922290000  |
| H | -0.8335140000 | -1.9641750000 | -3.8789270000 |
| H | 0.3506740000  | -2.1991330000 | -5.2114460000 |
| H | 3.3152560000  | -1.8954860000 | 0.1853410000  |
| H | 4.7669920000  | -1.1915660000 | -0.6069400000 |
| O | 0.8899400000  | -3.2679280000 | 2.0757040000  |
| O | 5.3461820000  | -3.1604270000 | -1.9594720000 |
| O | 5.0932610000  | -5.8287320000 | -2.7304230000 |
| H | 5.4656880000  | -4.9220080000 | -2.6426930000 |
| H | 4.3384970000  | -5.6874720000 | -2.1276680000 |

**CuBATPy<sup>2+</sup>**

|    |               |               |               |
|----|---------------|---------------|---------------|
| Cu | 12.3342840000 | 4.8236830000  | 0.9959710000  |
| O  | 14.2109550000 | 9.3021200000  | 0.8809320000  |
| O  | 12.8430440000 | 4.9621450000  | -1.3270590000 |
| H  | 13.4600220000 | 4.3578120000  | -1.7599080000 |
| H  | 12.4687550000 | 5.5060970000  | -2.0323600000 |
| N  | 12.5270960000 | 6.8520170000  | 1.5257650000  |
| N  | 14.0536810000 | 4.5616110000  | 2.1053210000  |
| N  | 10.3603480000 | 5.3333420000  | 0.9038180000  |
| N  | 12.5130990000 | 2.8168010000  | 0.7685450000  |
| C  | 14.6650420000 | 12.9763840000 | 0.8929800000  |
| H  | 14.1468060000 | 13.8811900000 | 0.6031140000  |
| C  | 14.0534780000 | 11.7376350000 | 0.6880140000  |
| H  | 13.0688420000 | 11.6960550000 | 0.2400990000  |
| C  | 14.7125360000 | 10.5758400000 | 1.0547270000  |
| C  | 12.8732500000 | 9.1634220000  | 0.4524760000  |
| H  | 12.7196550000 | 9.6381380000  | -0.5243840000 |
| H  | 12.1853130000 | 9.6373180000  | 1.1642260000  |
| C  | 12.6223620000 | 7.6728250000  | 0.2850250000  |
| H  | 11.6858470000 | 7.5263700000  | -0.2574990000 |
| H  | 13.4331080000 | 7.2565030000  | -0.3129280000 |
| C  | 13.7199560000 | 6.9584690000  | 2.4183390000  |
| H  | 13.5975660000 | 7.7679870000  | 3.1414480000  |
| H  | 14.5773530000 | 7.2288370000  | 1.8077580000  |
| C  | 13.9429480000 | 5.6348560000  | 3.1232430000  |
| H  | 14.8346370000 | 5.6855380000  | 3.7548750000  |
| H  | 13.0959820000 | 5.3800540000  | 3.7652880000  |
| C  | 15.2662110000 | 4.6783400000  | 1.2546790000  |
| H  | 15.1477980000 | 5.5416620000  | 0.5988770000  |
| H  | 15.2860210000 | 3.7857140000  | 0.6266670000  |
| C  | 11.2699670000 | 7.1189880000  | 2.2562590000  |
| H  | 11.1086180000 | 8.1914160000  | 2.3976160000  |
| H  | 11.3585990000 | 6.6747760000  | 3.2519540000  |
| C  | 10.1000710000 | 6.4898180000  | 1.5455020000  |
| C  | 8.8240070000  | 7.0319200000  | 1.5845050000  |
| H  | 8.6497360000  | 7.9669710000  | 2.1022660000  |
| C  | 7.7827290000  | 6.3572440000  | 0.9574140000  |
| H  | 6.7781540000  | 6.7612850000  | 0.9765170000  |
| C  | 8.0521440000  | 5.1596800000  | 0.3050640000  |
| H  | 7.2715390000  | 4.6011850000  | -0.1940980000 |
| C  | 9.3531110000  | 4.6846580000  | 0.3003300000  |
| H  | 9.6058340000  | 3.7562890000  | -0.1934810000 |
| C  | 13.9531610000 | 3.1949280000  | 2.6702330000  |
| H  | 13.2698690000 | 3.2268190000  | 3.5234740000  |
| H  | 14.9257040000 | 2.8294550000  | 3.0109320000  |
| C  | 13.4050340000 | 2.2703280000  | 1.6189450000  |
| C  | 13.7841870000 | 0.9393730000  | 1.5226910000  |
| H  | 14.5412740000 | 0.5519450000  | 2.1907840000  |

|   |               |               |               |
|---|---------------|---------------|---------------|
| C | 13.2057220000 | 0.1426490000  | 0.5425280000  |
| H | 13.4841640000 | -0.8997460000 | 0.4491980000  |
| C | 12.2802830000 | 0.7073380000  | -0.3293100000 |
| H | 11.8145370000 | 0.1245290000  | -1.1129380000 |
| C | 11.9712410000 | 2.0498670000  | -0.1903670000 |
| H | 11.2888630000 | 2.5423620000  | -0.8706210000 |
| O | 16.5314470000 | 9.4299340000  | 1.9919590000  |
| N | 18.6059210000 | 7.1177990000  | 2.1783400000  |
| N | 17.7482460000 | 4.5513780000  | 1.2547290000  |
| N | 18.7592790000 | 5.2897800000  | 4.2523660000  |
| N | 17.1282030000 | 1.7085140000  | 2.5931640000  |
| C | 15.9262930000 | 13.0389400000 | 1.4599450000  |
| H | 16.4078610000 | 13.9955140000 | 1.6172460000  |
| C | 16.5903210000 | 11.8698490000 | 1.8355950000  |
| H | 17.5749780000 | 11.9331380000 | 2.2784620000  |
| C | 15.9876250000 | 10.6340100000 | 1.6428270000  |
| C | 17.7715680000 | 9.4431930000  | 2.7084110000  |
| H | 17.6709350000 | 10.0903270000 | 3.5861990000  |
| H | 18.5732380000 | 9.8300680000  | 2.0707100000  |
| C | 18.0496930000 | 8.0160250000  | 3.1639000000  |
| H | 18.7522990000 | 8.0582300000  | 3.9970030000  |
| H | 17.1117310000 | 7.6187200000  | 3.5807220000  |
| C | 18.0044070000 | 6.9965320000  | 0.8729980000  |
| H | 18.4598800000 | 7.6640100000  | 0.1234000000  |
| H | 16.9673320000 | 7.3262740000  | 0.9649120000  |
| C | 18.0574250000 | 5.5768380000  | 0.2795820000  |
| H | 17.3834800000 | 5.5770560000  | -0.5967710000 |
| H | 19.0543360000 | 5.3609820000  | -0.1136790000 |
| C | 16.5783440000 | 4.7757710000  | 2.0630210000  |
| H | 16.6795390000 | 5.7494010000  | 2.5390280000  |
| H | 16.5730300000 | 4.0334140000  | 2.8596910000  |
| C | 19.8874720000 | 6.5277390000  | 2.4511480000  |
| H | 20.6671470000 | 7.2958260000  | 2.5769900000  |
| H | 20.1905020000 | 5.9372880000  | 1.5843470000  |
| C | 19.9179690000 | 5.6247280000  | 3.6787070000  |
| C | 21.1499380000 | 5.1851390000  | 4.1663160000  |
| H | 22.0695190000 | 5.4962560000  | 3.6828350000  |
| C | 21.1801180000 | 4.3609730000  | 5.2814340000  |
| H | 22.1242520000 | 4.0111930000  | 5.6819700000  |
| C | 19.9763970000 | 4.0058870000  | 5.8812970000  |
| H | 19.9485550000 | 3.3737090000  | 6.7597810000  |
| C | 18.8023230000 | 4.4976690000  | 5.3296810000  |
| H | 17.8430480000 | 4.2497950000  | 5.7752890000  |
| C | 17.9682270000 | 3.1715410000  | 0.8372930000  |
| H | 18.8488690000 | 3.1647830000  | 0.1926310000  |
| H | 17.1310480000 | 2.7571240000  | 0.2515240000  |
| C | 18.2063920000 | 2.2800380000  | 2.0321220000  |
| C | 19.4922730000 | 2.0995990000  | 2.5351350000  |
| H | 20.3329830000 | 2.5877190000  | 2.0582150000  |
| C | 19.6781980000 | 1.2902420000  | 3.6462640000  |
| H | 20.6699950000 | 1.1290870000  | 4.0498790000  |
| C | 18.5676540000 | 0.6910210000  | 4.2284840000  |
| H | 18.6623750000 | 0.0467510000  | 5.0932190000  |
| C | 17.3212530000 | 0.9358580000  | 3.6700910000  |
| H | 16.4319310000 | 0.4877360000  | 4.1047890000  |

**CuBATPic<sup>2-</sup>**

|    |               |               |               |
|----|---------------|---------------|---------------|
| Cu | 1.5212760000  | 26.1690650000 | 20.7374420000 |
| C  | -1.2767180000 | 23.7550670000 | 12.3435780000 |
| H  | -1.1820730000 | 24.8333950000 | 12.2654600000 |



|   |               |               |               |
|---|---------------|---------------|---------------|
| C | -2.5024520000 | 23.1177020000 | 12.1595350000 |
| C | -2.5584260000 | 21.7390960000 | 12.2619150000 |
| O | -2.5042190000 | 18.9888570000 | 12.1974050000 |
| N | -0.2245690000 | 21.6442880000 | 12.7725670000 |
| H | 3.5355160000  | 22.9798170000 | 13.9739940000 |
| H | 3.3298360000  | 25.2816110000 | 12.9001140000 |
| H | 4.7144170000  | 25.0575780000 | 14.0035720000 |
| C | 4.1940520000  | 27.8159290000 | 13.2824710000 |
| H | 4.5949450000  | 27.0508950000 | 12.6315860000 |
| C | 4.4382970000  | 29.1644650000 | 13.0097000000 |
| H | 5.0244860000  | 29.4308370000 | 12.1376430000 |
| C | 1.1898840000  | 23.6047360000 | 12.8680400000 |
| H | 1.9313920000  | 23.0105700000 | 12.3256920000 |
| H | 1.1744830000  | 24.6217350000 | 12.4266860000 |
| C | -0.1656000000 | 22.9749970000 | 12.6466670000 |
| C | -1.3936600000 | 21.0246690000 | 12.5772660000 |
| C | -1.4632700000 | 19.4838040000 | 12.6970370000 |
| O | 2.2473800000  | 27.9981350000 | 16.3249320000 |
| O | 3.1471310000  | 26.1853280000 | 14.7568820000 |
| O | -1.5532130000 | 26.3069470000 | 23.2879350000 |
| O | -0.1323700000 | 25.5815990000 | 21.6929490000 |
| O | 2.8805230000  | 27.2780240000 | 23.8807240000 |
| O | 4.5072960000  | 28.3575330000 | 22.7222050000 |
| O | 4.8277000000  | 22.8465270000 | 17.9553990000 |
| O | 6.4501850000  | 21.6056630000 | 16.9849280000 |
| O | -0.5763810000 | 18.9462120000 | 13.3925640000 |
| N | 2.4441390000  | 27.5994430000 | 19.4281070000 |
| N | 1.9448080000  | 24.8004300000 | 19.3201200000 |
| N | 0.1896660000  | 22.5151500000 | 16.8727650000 |
| N | 1.5896660000  | 23.6200260000 | 14.2642550000 |
| N | 1.1369970000  | 27.8125260000 | 21.6413270000 |
| N | 3.3728200000  | 25.4254250000 | 21.6233510000 |
| N | 2.9352380000  | 21.3772290000 | 16.6564020000 |
| C | 3.9413740000  | 30.1487580000 | 13.8455520000 |
| H | 4.1279460000  | 31.1959550000 | 13.6379590000 |
| C | 3.1946120000  | 29.7921580000 | 14.9732280000 |
| H | 2.8038180000  | 30.5617850000 | 15.6265960000 |
| C | 2.9494640000  | 28.4565020000 | 15.2514430000 |
| C | 1.8739070000  | 28.9177650000 | 17.3411080000 |
| H | 2.7298330000  | 29.5460470000 | 17.6168640000 |
| H | 1.0711620000  | 29.5715680000 | 16.9772050000 |
| C | 1.3873090000  | 28.0916630000 | 18.5245660000 |
| H | 0.8216470000  | 27.2427130000 | 18.1381610000 |
| H | 0.7049170000  | 28.6885220000 | 19.1327780000 |
| C | 3.4736520000  | 26.7430750000 | 18.8020040000 |
| H | 3.9757140000  | 27.2374100000 | 17.9635730000 |
| H | 4.2191360000  | 26.5411720000 | 19.5686440000 |
| C | 2.8396780000  | 25.4511020000 | 18.2941280000 |
| H | 3.6213600000  | 24.7457160000 | 17.9888750000 |
| H | 2.2352130000  | 25.6741360000 | 17.4167910000 |
| C | 0.7251700000  | 24.2196330000 | 18.6742510000 |
| H | 0.0274930000  | 23.9427100000 | 19.4665110000 |
| H | 0.2654180000  | 25.0167020000 | 18.0841160000 |
| C | 1.1589630000  | 23.0360800000 | 17.8155650000 |
| H | 1.4301490000  | 22.2092340000 | 18.4713070000 |
| H | 2.1066880000  | 23.3091870000 | 17.3385020000 |
| C | -0.3210750000 | 23.4584260000 | 15.8898660000 |
| H | -0.9077830000 | 22.8927830000 | 15.1666630000 |
| H | -1.0213020000 | 24.1419380000 | 16.3952460000 |
| C | 0.7001850000  | 24.3452160000 | 15.1588660000 |
| H | 0.1457720000  | 25.1319650000 | 14.6208130000 |

|   |               |               |               |
|---|---------------|---------------|---------------|
| H | 1.3112370000  | 24.8660490000 | 15.8961390000 |
| C | 3.0127530000  | 23.8049570000 | 14.4679040000 |
| H | 3.2369750000  | 23.7158280000 | 15.5328440000 |
| C | 3.6205820000  | 25.0998090000 | 13.9407150000 |
| C | 3.4463340000  | 27.4473380000 | 14.3951530000 |
| C | 2.9295640000  | 28.6642820000 | 20.3293770000 |
| H | 3.8587530000  | 28.3433390000 | 20.8114970000 |
| H | 3.1345600000  | 29.5995900000 | 19.7936990000 |
| C | 1.8981920000  | 28.8799920000 | 21.4179530000 |
| C | 1.7098090000  | 30.0159820000 | 22.1900400000 |
| H | 2.3391630000  | 30.8855070000 | 22.0493720000 |
| C | 0.7206070000  | 29.9911850000 | 23.1705070000 |
| H | 0.5732050000  | 30.8631130000 | 23.7981500000 |
| C | -0.0726050000 | 28.8628890000 | 23.3551730000 |
| H | -0.8546170000 | 28.8119850000 | 24.1007740000 |
| C | 0.1705690000  | 27.7621360000 | 22.5517090000 |
| C | -0.5867550000 | 26.4414370000 | 22.5448260000 |
| C | 2.7101700000  | 23.7335880000 | 20.0311570000 |
| H | 1.9937640000  | 23.1898250000 | 20.6545100000 |
| H | 3.1817790000  | 23.0582910000 | 19.3082760000 |
| C | 3.7636900000  | 24.3582110000 | 20.8977190000 |
| C | 5.0588410000  | 23.8697160000 | 20.9100220000 |
| H | 5.3260250000  | 23.0662390000 | 20.2316330000 |
| C | 5.9845020000  | 24.5135390000 | 21.7306540000 |
| H | 7.0148230000  | 24.1737690000 | 21.7553550000 |
| C | 5.5899540000  | 25.6190580000 | 22.4646340000 |
| H | 6.2892340000  | 26.1875030000 | 23.0645980000 |
| C | 4.2658380000  | 26.0637280000 | 22.3914130000 |
| C | 3.8427230000  | 27.3523260000 | 23.0968520000 |
| C | 0.5399470000  | 21.1663110000 | 16.3838970000 |
| H | 0.4020130000  | 20.4827660000 | 17.2327460000 |
| H | -0.1772180000 | 20.8826020000 | 15.6132340000 |
| C | 1.9524990000  | 20.9507110000 | 15.8586800000 |
| C | 2.2017040000  | 20.3256250000 | 14.6360250000 |
| H | 1.3773230000  | 20.0049400000 | 14.0049550000 |
| C | 3.5339710000  | 20.1388930000 | 14.2770840000 |
| H | 3.7709300000  | 19.6357390000 | 13.3433820000 |
| C | 4.5548400000  | 20.6150910000 | 15.0967550000 |
| H | 5.6037840000  | 20.5111330000 | 14.8467890000 |
| C | 4.2108450000  | 21.2700750000 | 16.2790640000 |
| C | 5.2674500000  | 21.9669690000 | 17.1534410000 |
| H | -3.3938660000 | 23.6968210000 | 11.9337320000 |
| H | -3.4641660000 | 21.1691080000 | 12.0990900000 |
